# Supplementary material
Source: MDPI journal article supplement (https://www.mdpi.com/2076-3417/7/1/85)
Supplement: s1 [file s1]

## Supplementary Materials: Enhanced Iron and Selenium Uptake in Plants by Volatile Emissions of *Bacillus amyloliquefaciens* (BF06)

Jianfei Wang, Cheng Zhou, Xin Xiao, Yue Xie, Lin Zhu and Zhongyou Ma

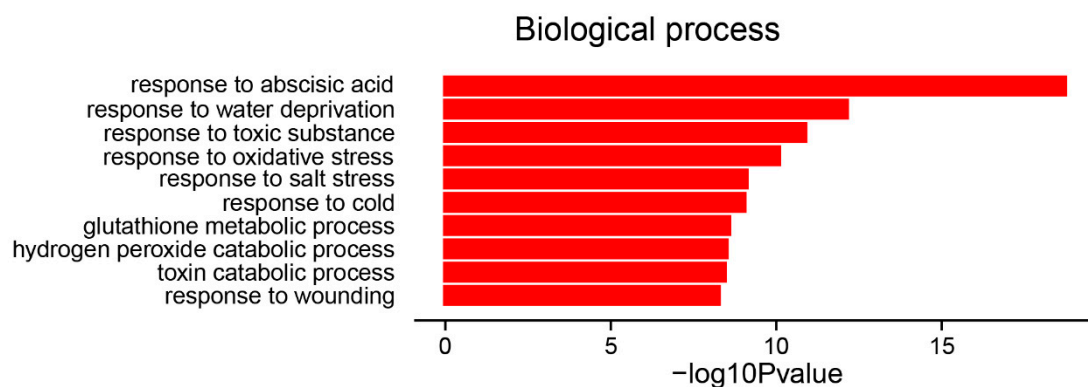

**Figure S1:** List of the top ten 10 significant GO terms in biological process (BP) domain for down-regulated differentially expressed genes (DEGs) in the VOCs-exposed plants based on GO classifications. The  $p$  value indicates a significant difference of the comparison between the control and VOCs-exposed plants.
