# Supplementary material
Source: MDPI journal article supplement (https://www.mdpi.com/2076-3417/7/1/85)
Supplement: s1 [file s1 › Table S1.xlsx]

## Sheet: Table S1
Table S1. Primers used in this study.
Gene	Usage	Sequence (5'-3‘)
FIT1	qPCR	CAACACCTGTCGATGACC
		TCACCACCGGCTCTAACA
FRO2	qPCR	GCTTTGGTTATGGTGTGCG
		CCCAGCTTTTGCTTCATCT
IRT1	qPCR	CTTGAAGAGAACCCGTGG
		GGTAACATCATTTGCGGGG
SULTR1;1	qPCR	CCACCGCTGATTTACGC CGATTGTGATGGCTGCTC
SULTR1;2	qPCR	AAACCTTCACCCACTCG
		ACTTAGGCTGATCCTTAAA
SULTR2;1	qPCR	AAGGTTTGCTTGGTATCACT
		TGCTCGTCGGCTTTAGT
SULTR2;2	qPCR	ATTGGTCCTGTGGCTGTA
		CAAAGATGGCTTGAAACG
SULTR3;5	qPCR	TACCTTGGCTGGTGTCTG
		AAAGCGATGAGTCCTGTG
ACTIN2	qPCR	GAAATCACAGCACTTGCA
		AGCCTTTGATCTTGAGAG
