# Supplementary material
Source: MDPI journal article supplement (https://www.mdpi.com/2076-3417/7/1/85)
Supplement: s1 [file s1 › Table S2.xlsx]

## Sheet: Sheet1
Table S2. Volatile profile of Bacillus amyloliqefaciens BF06, using headspace solid-phase micro extraction (SPME) combined with gas chromatography-mass spectrometry (GC-MS). Different letters represent significant difference between the control and VOCs-exposed plants at p < 0.05.
	RT	Compounds	Bacterial VOCs production (μg)
	2.71	2-Pentanone	5.6 ± 0.21b
	3.03	1-Pentanol	3.2 ± 0.16c
	3.53	Neopemyl acetate	5.6 ± 0.25b
	3.62	Hydrazine	6.1 ± 0.33a
	4.36	3,4-Hexanedione	1.5 ± 0.08d
	5.45	2-Heptanone	0.6 ± 0.03e
	5.71	Ethyl pentanoate	5.1 ± 0.35b
	5.83	2,3-Butanedione	11.7 ± 0.39a
	5.92	Furan-2-methyl	5.0 ± 0.15b
	6.27	Ethyl acetate	0.7 ± 0.11e
	7.31	1-Butanol	9.6 ± 0.61a
	7.42	3-Ocatanone	5.2 ± 0.17b
	7.62	Acetylene	2.6 ± 0.04c
	8.75	1-Butanol-2-methyl	0.7 ± 0.08e
	9.68	2,3-Butanediol	12.1 ± 0.78a
	12.53	Decanal	15.4 ± 1.22a
	15.27	2-Undecanone	11.3 ± 0.83a
	16.65	Benzothiazole	6.3 ± 0.45b
	18.17	Biphenyl	0.7 ± 0.05e
	19.78	2-Dodecanone	5.9 ± 0.35b
	23.22	2-Tridecanone	5.7 ± 0.34b
