# Supplementary material
Source: MDPI journal article supplement (https://www.mdpi.com/2076-3417/7/1/85)
Supplement: s1 [file s1 › Table S3.xlsx]

## Sheet: DEGs
Table S3. Up-regulated and down-regulated genes (more than 2 folds) differentially expressed in the VOCs-exposed plants.
ID	log2Fold Change	Gene name	Annotataion
AT4G13420	6.83144	POT5	Potassium transporter 5 [Source:UniProtKB/Swiss-Prot;Acc:Q9M7K4]
AT1G01580	3.83659	FRO2	Ferric reduction oxidase 2 [Source:UniProtKB/Swiss-Prot;Acc:P92949]
AT3G62960	5.31118	GRXC14	Glutaredoxin-C14 [Source:UniProtKB/Swiss-Prot;Acc:Q9LYC5]
AT1G21890	5.23318		WAT1-related protein At1g21890 [Source:UniProtKB/Swiss-Prot;Acc:F4HZQ7]
AT2G28160	5.19382	FIT	Transcription factor FER-LIKE IRON DEFICIENCY-INDUCED TRANSCRIPTION FACTOR [Source:UniProtKB/Swiss-Prot;Acc:Q0V7X4]
AT1G60360	4.92123		RING/U-box superfamily protein [Source:TAIR;Acc:AT1G60360]
AT5G04150	4.40009	BHLH101	Transcription factor bHLH101 [Source:UniProtKB/Swiss-Prot;Acc:Q9FYE6]
AT3G12890	4.38518	ASML2	activator of spomin::LUC2 [Source:TAIR;Acc:AT3G12890]
AT4G39250	4.20076	RL1	Protein RADIALIS-like 1 [Source:UniProtKB/Swiss-Prot;Acc:F4JVB8]
AT1G09880	4.06325		Rhamnogalacturonate lyase family protein [Source:TAIR;Acc:AT1G09880]
AT5G26320	4.06325		TRAF-like family protein [Source:TAIR;Acc:AT5G26320]
AT4G05430	3.97014		Carbohydrate-binding X8 domain superfamily protein [Source:TAIR;Acc:AT4G05430]
AT3G28960	3.8777		Transmembrane amino acid transporter family protein [Source:TAIR;Acc:AT3G28960]
AT1G34480	3.87061		Cysteine/Histidine-rich C1 domain family protein [Source:TAIR;Acc:AT1G34480]
AT2G24030	3.87061		zinc ion binding;nucleic acid binding [Source:TAIR;Acc:AT2G24030]
AT3G62950	3.87061	GRXC11	Glutaredoxin-C11 [Source:UniProtKB/Swiss-Prot;Acc:Q9LYC6]
AT3G51895	3.85672	SULTR3;1	Sulfate transporter 3.1 [Source:UniProtKB/Swiss-Prot;Acc:Q9SV13]
AT4G19690	3.83954	IRT1	Fe(2+) transport protein 1 [Source:UniProtKB/Swiss-Prot;Acc:Q38856]
AT5G04700	3.80022		Ankyrin repeat family protein [Source:TAIR;Acc:AT5G04700]
AT1G69320	3.76369	CLE10	CLAVATA3/ESR (CLE)-related protein 10 [Source:UniProtKB/Swiss-Prot;Acc:Q4PSX1]
AT1G49230	3.76369	ATL78	RING-H2 finger protein ATL78 [Source:UniProtKB/Swiss-Prot;Acc:Q6NQG7]
AT1G60960	3.71342	IRT3	Fe(2+) transport protein 3, chloroplastic [Source:UniProtKB/Swiss-Prot;Acc:Q8LE59]
AT3G49160	3.69884	PKP4	Plastidial pyruvate kinase 4, chloroplastic [Source:UniProtKB/Swiss-Prot;Acc:Q9M3B6]
AT2G39510	3.66991		WAT1-related protein At2g39510 [Source:UniProtKB/Swiss-Prot;Acc:O80638]
AT5G15120	3.66528	PCO1	Plant cysteine oxidase 1 [Source:UniProtKB/Swiss-Prot;Acc:Q9LXG9]
AT1G02630	3.64822	ETN8	Equilibrative nucleotide transporter 8 [Source:UniProtKB/Swiss-Prot;Acc:Q84XI3]
AT1G14550	3.64822	PER5	Peroxidase 5 [Source:UniProtKB/Swiss-Prot;Acc:Q9M9Q9]
AT4G20160	3.64822		LOCATED IN: chloroplast; EXPRESSED IN: 6 plant structures; EXPRESSED DURING: L mature pollen stage, M germinated pollen stage, 4 anthesis, petal differentiation and expansion stage; BEST Arabidopsis thaliana protein match is: RING/U-box superfamily /.../n (TAIR:AT1G30860.1); Has 64917 Blast hits to 39974 proteins in 1949 species: Archae - 279; Bacteria - 7425; Metazoa - 26604; Fungi - 5788; Plant…
AT4G08620	3.64822	SULTR1;1	Sulfate transporter 1.1 [Source:UniProtKB/Swiss-Prot;Acc:Q9SAY1]
AT4G19430	3.52268		unknown protein; FUNCTIONS IN: molecular_function unknown; INVOLVED IN: biological_process unknown; LOCATED IN: chloroplast; EXPRESSED IN: 17 plant structures; EXPRESSED DURING: 13 growth stages; Has 30201 Blast hits to 17322 proteins in 780 species /.../ae - 12; Bacteria - 1396; Metazoa - 17338; Fungi - 3422; Plants - 5037; Viruses - 0; Other Eukaryotes - 2996 (source: NCBI BLink). [Source:TAIR;…
AT2G32860	3.51803	BGLU33	Beta-glucosidase 33 [Source:UniProtKB/Swiss-Prot;Acc:O48779]
At2g28160	3.49562	BHLH029	Transcription factor bHLH029 [Source:UniProtKB/Swiss-Prot;Acc:Q0V7X4]
AT5G45520	3.48472		Leucine-rich repeat (LRR) family protein [Source:TAIR;Acc:AT5G45520]
AT2G44570	3.47829	AtGH9B12	Endoglucanase 15 [Source:UniProtKB/Swiss-Prot;Acc:O80497]
AT3G10680	3.46925		HSP20-like chaperones superfamily protein [Source:TAIR;Acc:AT3G10680]
AT1G77990	3.4329	SULTR2;2	Sulfate transporter 2.2 [Source:UniProtKB/Swiss-Prot;Acc:P92946]
AT2G45550	3.38518	CYP76C4	Cytochrome P450 76C4 [Source:UniProtKB/Swiss-Prot;Acc:O64635]
AT3G57260	3.38518	BG2	Glucan endo-1,3-beta-glucosidase, acidic isoform [Source:UniProtKB/Swiss-Prot;Acc:P33157]
AT4G25000	3.38518	AMY1	Alpha-amylase 1 [Source:UniProtKB/Swiss-Prot;Acc:Q8VZ56]
AT2G21650	3.36281	RL2	Protein RADIALIS-like 2 [Source:UniProtKB/Swiss-Prot;Acc:Q9SIJ5]
AT4G33810	3.24648		Glycosyl hydrolase superfamily protein [Source:TAIR;Acc:AT4G33810]
AT4G21970	3.23318		Protein of unknown function, DUF584 [Source:TAIR;Acc:AT4G21970]
AT4G31620	3.23318	REM3	B3 domain-containing protein REM3 [Source:UniProtKB/Swiss-Prot;Acc:Q8VZQ9]
AT5G57520	3.23318	ZFP2	Zinc finger protein 2 [Source:UniProtKB/Swiss-Prot;Acc:Q39261]
AT5G61412	3.23318		unknown protein; FUNCTIONS IN: molecular_function unknown; INVOLVED IN: biological_process unknown; LOCATED IN: cellular_component unknown; BEST Arabidopsis thaliana protein match is: unknown protein (TAIR:AT4G33145.1); Has 30201 Blast hits to 17322 /.../ins in 780 species: Archae - 12; Bacteria - 1396; Metazoa - 17338; Fungi - 3422; Plants - 5037; Viruses - 0; Other Eukaryotes - 2996 (source: NC…
AT5G67050	3.23318		alpha/beta-Hydrolases superfamily protein [Source:TAIR;Acc:AT5G67050]
AT4G34320	3.15072		UPF0496 protein At4g34320 [Source:UniProtKB/Swiss-Prot;Acc:Q9SYZ7]
AT1G33055	3.09888		unknown protein; FUNCTIONS IN: molecular_function unknown; INVOLVED IN: anaerobic respiration; LOCATED IN: endomembrane system; EXPRESSED IN: 13 plant structures; EXPRESSED DURING: 6 growth stages; Has 20 Blast hits to 20 proteins in 8 species: Arch /.../; Bacteria - 0; Metazoa - 0; Fungi - 0; Plants - 20; Viruses - 0; Other Eukaryotes - 0 (source: NCBI BLink). [Source:TAIR;Acc:AT1G33055]
AT1G23090	3.08634	SULTR3;3	Probable sulfate transporter 3.3 [Source:UniProtKB/Swiss-Prot;Acc:Q9SXS2]
AT1G52820	3.06325		2-oxoglutarate (2OG) and Fe(II)-dependent oxygenase superfamily protein [Source:TAIR;Acc:AT1G52820]
AT2G14560	3.06325	LURP1	Protein LURP1 [Source:UniProtKB/Swiss-Prot;Acc:Q9ZQR8]
AT2G42005	3.06325		Amino acid transporter ANTL1 [Source:UniProtKB/Swiss-Prot;Acc:F4ILY9]
AT4G13992	3.06325		Cysteine/Histidine-rich C1 domain family protein [Source:TAIR;Acc:AT4G13992]
AT5G21150	3.06325	AGO9	Protein argonaute 9 [Source:UniProtKB/Swiss-Prot;Acc:Q84VQ0]
AT5G50790	3.06325	SWEET10	Bidirectional sugar transporter SWEET10 [Source:UniProtKB/Swiss-Prot;Acc:Q9LUE3]
ATCG01040	3.06325	CCSA	Cytochrome c biogenesis protein CcsA [Source:UniProtKB/Swiss-Prot;Acc:P56770]
AT1G15125	3.05503		S-adenosyl-L-methionine-dependent methyltransferases superfamily protein [Source:TAIR;Acc:AT1G15125]
AT2G39850	3.02327		Subtilisin-like serine endopeptidase family protein [Source:TAIR;Acc:AT2G39850]
AT1G26290	3.00185		unknown protein; Has 126 Blast hits to 112 proteins in 36 species: Archae - 0; Bacteria - 6; Metazoa - 14; Fungi - 3; Plants - 14; Viruses - 0; Other Eukaryotes - 89 (source: NCBI BLink). [Source:TAIR;Acc:AT1G26290]
AT2G47880	2.99816	GRXC13	Glutaredoxin-C13 [Source:UniProtKB/Swiss-Prot;Acc:O82255]
AT5G25370	2.99399	PLDZETA	Phospholipase D zeta [Source:UniProtKB/Swiss-Prot;Acc:P58766]
AT1G61710	2.97014		Cysteine/Histidine-rich C1 domain family protein [Source:TAIR;Acc:AT1G61710]
AT5G10180	2.92052	SULTR2;1	Sulfate transporter 2.1 [Source:UniProtKB/Swiss-Prot;Acc:O04722]
AT3G15800	2.91125		Glycosyl hydrolase superfamily protein [Source:TAIR;Acc:AT3G15800]
AT1G15825	2.87061		hydroxyproline-rich glycoprotein family protein [Source:TAIR;Acc:AT1G15825]
AT1G79480	2.87061		Carbohydrate-binding X8 domain superfamily protein [Source:TAIR;Acc:AT1G79480]
AT2G20362	2.87061		unknown protein; FUNCTIONS IN: molecular_function unknown; INVOLVED IN: biological_process unknown; LOCATED IN: cellular_component unknown; BEST Arabidopsis thaliana protein match is: unknown protein (TAIR:AT1G63310.1); Has 30201 Blast hits to 17322 /.../ins in 780 species: Archae - 12; Bacteria - 1396; Metazoa - 17338; Fungi - 3422; Plants - 5037; Viruses - 0; Other Eukaryotes - 2996 (source: NC…
AT3G11150	2.87061		2-oxoglutarate (2OG) and Fe(II)-dependent oxygenase superfamily protein [Source:TAIR;Acc:AT3G11150]
AT3G13840	2.87061	SCL29	Scarecrow-like protein 29 [Source:UniProtKB/Swiss-Prot;Acc:Q9LRW3]
AT3G28060	2.87061		WAT1-related protein At3g28060 [Source:UniProtKB/Swiss-Prot;Acc:F4IXT6]
AT3G50390	2.87061		Transducin/WD40 repeat-like superfamily protein [Source:TAIR;Acc:AT3G50390]
AT3G58480	2.87061		calmodulin-binding family protein [Source:TAIR;Acc:AT3G58480]
AT4G17860	2.87061		Protein of Unknown Function (DUF239) [Source:TAIR;Acc:AT4G17860]
AT4G19050	2.87061		Putative disease resistance protein At4g19050 [Source:UniProtKB/Swiss-Prot;Acc:P0CB16]
AT5G49130	2.87061		MATE efflux family protein [Source:TAIR;Acc:AT5G49130]
AT5G61160	2.87061	ACT	Agmatine coumaroyltransferase [Source:UniProtKB/Swiss-Prot;Acc:Q9FNP9]
AT3G05620	2.83584	PME22	Putative pectinesterase/pectinesterase inhibitor 22 [Source:UniProtKB/Swiss-Prot;Acc:Q9M9W7]
AT1G22150	2.83584	SULTR1;3	Sulfate transporter 1.3 [Source:UniProtKB/Swiss-Prot;Acc:Q9FEP7]
AT5G04680	2.80741		Ankyrin repeat family protein [Source:TAIR;Acc:AT5G04680]
AT1G19510	2.80022	RL5	Protein RADIALIS-like 5 [Source:UniProtKB/Swiss-Prot;Acc:Q8GW75]
AT5G45530	2.77375		Protein of unknown function (DUF594) [Source:TAIR;Acc:AT5G45530]
AT1G04800	2.76437		glycine-rich protein [Source:TAIR;Acc:AT1G04800]
AT3G20865	2.76369	AGP40	Probable arabinogalactan protein 40 [Source:UniProtKB/Swiss-Prot;Acc:Q8LD43]
AT5G09670	2.76369		loricrin-related [Source:TAIR;Acc:AT5G09670]
AT3G01960	2.75131		unknown protein; Has 13 Blast hits to 13 proteins in 5 species: Archae - 0; Bacteria - 0; Metazoa - 0; Fungi - 0; Plants - 13; Viruses - 0; Other Eukaryotes - 0 (source: NCBI BLink). [Source:TAIR;Acc:AT3G01960]
AT5G37950	2.74133		UDP-Glycosyltransferase superfamily protein [Source:TAIR;Acc:AT5G37950]
AT5G56720	2.74133		Lactate/malate dehydrogenase family protein [Source:TAIR;Acc:AT5G56720]
AT1G49860	2.73611	GSTF14	Glutathione S-transferase F14 [Source:UniProtKB/Swiss-Prot;Acc:Q9C6C8]
AT5G18600	2.7167	GRXS2	Monothiol glutaredoxin-S2 [Source:UniProtKB/Swiss-Prot;Acc:Q8L8Z8]
AT1G06830	2.69004	GRXS11	Monothiol glutaredoxin-S11 [Source:UniProtKB/Swiss-Prot;Acc:Q9M9Y9]
AT1G19960	2.68216		BEST Arabidopsis thaliana protein match is: transmembrane receptors (TAIR:AT2G32140.1); Has 41 Blast hits to 41 proteins in 17 species: Archae - 0; Bacteria - 2; Metazoa - 23; Fungi - 0; Plants - 11; Viruses - 0; Other Eukaryotes - 5 (source: NCBI BLink). [Source:TAIR;Acc:AT1G19960]
AT3G61210	2.6757		S-adenosyl-L-methionine-dependent methyltransferases superfamily protein [Source:TAIR;Acc:AT3G61210]
AT2G41240	2.66088	BHLH100	Transcription factor bHLH100 [Source:UniProtKB/Swiss-Prot;Acc:Q9ZVB5]
AT3G02550	2.65608	LBD41	LOB domain-containing protein 41 [Source:UniProtKB/Swiss-Prot;Acc:Q9M886]
AT1G06923	2.64822		BEST Arabidopsis thaliana protein match is: ovate family protein 17 (TAIR:AT2G30395.1); Has 35333 Blast hits to 34131 proteins in 2444 species: Archae - 798; Bacteria - 22429; Metazoa - 974; Fungi - 991; Plants - 531; Viruses - 0; Other Eukaryotes - /.../(source: NCBI BLink). [Source:TAIR;Acc:AT1G06923]
AT1G33840	2.64822		Protein of unknown function (DUF567) [Source:TAIR;Acc:AT1G33840]
AT1G33870	2.64822		P-loop containing nucleoside triphosphate hydrolases superfamily protein [Source:TAIR;Acc:AT1G33870]
AT2G18180	2.64822	SFH10	Phosphatidylinositol/phosphatidylcholine transfer protein SFH10 [Source:UniProtKB/Swiss-Prot;Acc:Q9SI13]
AT2G20870	2.64822		Putative cell wall protein [Source:UniProtKB/Swiss-Prot;Acc:P47925]
AT2G33880	2.64822	WOX9	WUSCHEL-related homeobox 9 [Source:UniProtKB/Swiss-Prot;Acc:Q6X7J4]
AT2G42340	2.64822		unknown protein; Has 11 Blast hits to 11 proteins in 5 species: Archae - 0; Bacteria - 2; Metazoa - 0; Fungi - 2; Plants - 6; Viruses - 0; Other Eukaryotes - 1 (source: NCBI BLink). [Source:TAIR;Acc:AT2G42340]
AT2G42480	2.64822		TRAF-like family protein [Source:TAIR;Acc:AT2G42480]
AT2G45420	2.64822	LBD18	LOB domain-containing protein 18 [Source:UniProtKB/Swiss-Prot;Acc:O22131]
AT3G57440	2.64822		unknown protein; Has 31 Blast hits to 31 proteins in 11 species: Archae - 0; Bacteria - 0; Metazoa - 0; Fungi - 0; Plants - 31; Viruses - 0; Other Eukaryotes - 0 (source: NCBI BLink). [Source:TAIR;Acc:AT3G57440]
AT4G00890	2.64822		proline-rich family protein [Source:TAIR;Acc:AT4G00890]
AT4G10950	2.64822		SGNH hydrolase-type esterase superfamily protein [Source:TAIR;Acc:AT4G10950]
AT4G11480	2.64822	CRK32	Putative cysteine-rich receptor-like protein kinase 32 [Source:UniProtKB/Swiss-Prot;Acc:Q9LDS6]
AT4G11720	2.64822	HAP2	Protein HAPLESS 2 [Source:UniProtKB/Swiss-Prot;Acc:F4JP36]
AT4G31615	2.64822	REM2	B3 domain-containing protein REM2 [Source:UniProtKB/Swiss-Prot;Acc:Q3E9T2]
AT5G11990	2.64822		proline-rich family protein [Source:TAIR;Acc:AT5G11990]
AT5G28491	2.64822		unknown protein; Has 30201 Blast hits to 17322 proteins in 780 species: Archae - 12; Bacteria - 1396; Metazoa - 17338; Fungi - 3422; Plants - 5037; Viruses - 0; Other Eukaryotes - 2996 (source: NCBI BLink). [Source:TAIR;Acc:AT5G28491]
AT5G28646	2.64822	WVD2	Protein WAVE-DAMPENED 2 [Source:UniProtKB/Swiss-Prot;Acc:Q84ZT9]
AT5G56840	2.62397		myb-like transcription factor family protein [Source:TAIR;Acc:AT5G56840]
ATCG00160	2.59931	RPS2	30S ribosomal protein S2, chloroplastic [Source:UniProtKB/Swiss-Prot;Acc:P56797]
AT2G35890	2.56575	CPK25	Calcium-dependent protein kinase 25 [Source:UniProtKB/Swiss-Prot;Acc:Q9SJ61]
AT4G14140	2.56575	MET4	DNA (cytosine-5)-methyltransferase 4 [Source:UniProtKB/Swiss-Prot;Acc:O23273]
AT4G39810	2.56575	NEN4	Protein NEN4 [Source:UniProtKB/Swiss-Prot;Acc:F4JJ23]
AT5G65980	2.54813		Auxin efflux carrier family protein [Source:TAIR;Acc:AT5G65980]
AT1G55180	2.53274	PLDEPSILON	Phospholipase D epsilon [Source:UniProtKB/Swiss-Prot;Acc:Q9C888]
AT1G12600	2.52269	UTR4	UDP-galactose/UDP-glucose transporter 4 [Source:UniProtKB/Swiss-Prot;Acc:Q9LDX3]
AT1G26360	2.52269	MES13	Putative methylesterase 13, chloroplastic [Source:UniProtKB/Swiss-Prot;Acc:F4IE65]
AT1G63630	2.52269		Tetratricopeptide repeat (TPR)-like superfamily protein [Source:TAIR;Acc:AT1G63630]
AT4G16015	2.52269		Cysteine/Histidine-rich C1 domain family protein [Source:TAIR;Acc:AT4G16015]
AT3G09330	2.52269		Transmembrane amino acid transporter family protein [Source:TAIR;Acc:AT3G09330]
AT5G20870	2.50383		O-Glycosyl hydrolases family 17 protein [Source:TAIR;Acc:AT5G20870]
AT5G46220	2.49623		Protein of unknown function (DUF616) [Source:TAIR;Acc:AT5G46220]
AT4G26830	2.48952		O-Glycosyl hydrolases family 17 protein [Source:TAIR;Acc:AT4G26830]
AT5G04770	2.48439	CAT6	Cationic amino acid transporter 6, chloroplastic [Source:UniProtKB/Swiss-Prot;Acc:Q9LZ20]
AT5G11620	2.47829		SWIM zinc finger family protein / mitogen-activated protein kinase kinase kinase (MAPKKK)-related [Source:TAIR;Acc:AT5G11620]
AT1G73370	2.46435	SUS6	Sucrose synthase 6 [Source:UniProtKB/Swiss-Prot;Acc:Q9FX32]
AT2G28580	2.45557		Plant protein of unknown function (DUF247) [Source:TAIR;Acc:AT2G28580]
AT5G39471	2.45557		Cysteine/Histidine-rich C1 domain family protein [Source:TAIR;Acc:AT5G39471]
AT1G32540	2.45213	LOL1	Protein LOL1 [Source:UniProtKB/Swiss-Prot;Acc:Q93ZB1]
AT3G46880	2.44792		unknown protein; FUNCTIONS IN: molecular_function unknown; INVOLVED IN: biological_process unknown; LOCATED IN: chloroplast; EXPRESSED IN: 14 plant structures; EXPRESSED DURING: 9 growth stages; BEST Arabidopsis thaliana protein match is: unknown pr /.../(TAIR:AT5G59080.1); Has 51 Blast hits to 51 proteins in 8 species: Archae - 0; Bacteria - 0; Metazoa - 0; Fungi - 0; Plants - 51; Viruses - 0; O…
AT4G23030	2.43249		MATE efflux family protein [Source:TAIR;Acc:AT4G23030]
AT2G32235	2.42081		unknown protein; Has 38 Blast hits to 38 proteins in 14 species: Archae - 0; Bacteria - 4; Metazoa - 11; Fungi - 11; Plants - 11; Viruses - 0; Other Eukaryotes - 1 (source: NCBI BLink). [Source:TAIR;Acc:AT2G32235]
AT5G18430	2.40721		GDSL esterase/lipase At5g18430 [Source:UniProtKB/Swiss-Prot;Acc:Q5PNZ0]
AT5G19600	2.40162	SULTR3;5	Probable sulfate transporter 3.5 [Source:UniProtKB/Swiss-Prot;Acc:Q94LW6]
AT1G11080	2.39724	SCPL31	Serine carboxypeptidase-like 31 [Source:UniProtKB/Swiss-Prot;Acc:O04084]
AT3G01670	2.39088	SEOA	Protein SIEVE ELEMENT OCCLUSION A [Source:UniProtKB/Swiss-Prot;Acc:Q93XX2]
AT1G22380	2.38518	UGT85A3	UDP-glycosyltransferase 85A3 [Source:UniProtKB/Swiss-Prot;Acc:Q9LMF1]
AT1G32570	2.38518		unknown protein; Has 2 Blast hits to 2 proteins in 1 species: Archae - 0; Bacteria - 0; Metazoa - 0; Fungi - 0; Plants - 2; Viruses - 0; Other Eukaryotes - 0 (source: NCBI BLink). [Source:TAIR;Acc:AT1G32570]
AT1G44020	2.38518		Cysteine/Histidine-rich C1 domain family protein [Source:TAIR;Acc:AT1G44020]
AT1G62700	2.38518	NAC026	NAC domain-containing protein 26 [Source:UniProtKB/Swiss-Prot;Acc:F4HYV5]
AT1G68480	2.38518	JAG	Zinc finger protein JAGGED [Source:UniProtKB/Swiss-Prot;Acc:Q6S591]
AT1G79250	2.38518	AGC1-7	Serine/threonine-protein kinase AGC1-7 [Source:UniProtKB/Swiss-Prot;Acc:Q1PFB9]
AT2G33750	2.38518	PUP2	Purine permease 2 [Source:UniProtKB/Swiss-Prot;Acc:Q94GB1]
AT2G34238	2.38518		unknown protein; Has 30201 Blast hits to 17322 proteins in 780 species: Archae - 12; Bacteria - 1396; Metazoa - 17338; Fungi - 3422; Plants - 5037; Viruses - 0; Other Eukaryotes - 2996 (source: NCBI BLink). [Source:TAIR;Acc:AT2G34238]
AT2G34580	2.38518		CONTAINS InterPro DOMAIN/s: Herpesvirus UL139, cytomegalovirus (InterPro:IPR021042); Has 30201 Blast hits to 17322 proteins in 780 species: Archae - 12; Bacteria - 1396; Metazoa - 17338; Fungi - 3422; Plants - 5037; Viruses - 0; Other Eukaryotes - 2 /.../ource: NCBI BLink). [Source:TAIR;Acc:AT2G34580]
AT2G36985	2.38518	ROT4	DVL family protein [Source:TAIR;Acc:AT2G36985]
AT2G40750	2.38518	WRKY54	Probable WRKY transcription factor 54 [Source:UniProtKB/Swiss-Prot;Acc:Q93WU8]
AT2G44990	2.38518	CCD7	carotenoid cleavage dioxygenase 7 [Source:TAIR;Acc:AT2G44990]
AT3G01015	2.38518		TPX2 (targeting protein for Xklp2) protein family [Source:TAIR;Acc:AT3G01015]
AT3G01870	2.38518		Plant protein of unknown function (DUF946) [Source:TAIR;Acc:AT3G01870]
AT3G48290	2.38518	CYP71A24	Cytochrome P450 71A24 [Source:UniProtKB/Swiss-Prot;Acc:Q9STK9]
AT3G48300	2.38518	CYP71A23	Cytochrome P450 71A23 [Source:UniProtKB/Swiss-Prot;Acc:Q9STL0]
AT3G57210	2.38518		UPF0725 protein At3g57210 [Source:UniProtKB/Swiss-Prot;Acc:Q5BPN1]
AT4G02160	2.38518		unknown protein; BEST Arabidopsis thaliana protein match is: unknown protein (TAIR:AT5G61710.1); Has 35 Blast hits to 35 proteins in 9 species: Archae - 0; Bacteria - 0; Metazoa - 0; Fungi - 0; Plants - 35; Viruses - 0; Other Eukaryotes - 0 (source: /.../BLink). [Source:TAIR;Acc:AT4G02160]
AT4G16220	2.38518		GDSL-like Lipase/Acylhydrolase superfamily protein [Source:TAIR;Acc:AT4G16220]
AT4G19850	2.38518	PP2A2	Protein PHLOEM PROTEIN 2-LIKE A2 [Source:UniProtKB/Swiss-Prot;Acc:O81866]
AT4G29760	2.38518		unknown protein; BEST Arabidopsis thaliana protein match is: unknown protein (TAIR:AT4G29770.2); Has 63 Blast hits to 63 proteins in 2 species: Archae - 0; Bacteria - 0; Metazoa - 0; Fungi - 0; Plants - 63; Viruses - 0; Other Eukaryotes - 0 (source: /.../BLink). [Source:TAIR;Acc:AT4G29760]
AT4G39360	2.38518		unknown protein; BEST Arabidopsis thaliana protein match is: unknown protein (TAIR:AT2G21780.1); Has 13 Blast hits to 13 proteins in 2 species: Archae - 0; Bacteria - 0; Metazoa - 0; Fungi - 0; Plants - 13; Viruses - 0; Other Eukaryotes - 0 (source: /.../BLink). [Source:TAIR;Acc:AT4G39360]
AT5G17030	2.38518	UGT78D3	UDP-glycosyltransferase 78D3 [Source:UniProtKB/Swiss-Prot;Acc:Q9LFK0]
AT5G22240	2.38518	OFP10	Transcription repressor OFP10 [Source:UniProtKB/Swiss-Prot;Acc:Q9FMS7]
AT5G45240	2.38518		Disease resistance protein (TIR-NBS-LRR class) [Source:TAIR;Acc:AT5G45240]
AT5G52340	2.38518	ATEXO70A2	exocyst subunit exo70 family protein A2 [Source:TAIR;Acc:AT5G52340]
ATMG00520	2.38518	MATR	Intron maturase, type II family protein [Source:TAIR;Acc:ATMG00520]
AT5G15240	2.3722		Transmembrane amino acid transporter family protein [Source:TAIR;Acc:AT5G15240]
ATCG00170	2.3686	RPOC2	DNA-directed RNA polymerase subunit beta'' [Source:UniProtKB/Swiss-Prot;Acc:P56764]
AT2G33810	2.35871	SPL3	Squamosa promoter-binding-like protein 3 [Source:UniProtKB/Swiss-Prot;Acc:P93015]
ATCG00740	2.35083	RPOA	DNA-directed RNA polymerase subunit alpha [Source:UniProtKB/Swiss-Prot;Acc:P56762]
AT2G44930	2.34866		Plant protein of unknown function (DUF247) [Source:TAIR;Acc:AT2G44930]
AT3G23210	2.34401	BHLH34	Transcription factor bHLH34 [Source:UniProtKB/Swiss-Prot;Acc:Q9LTC7]
AT1G24577	2.34336		unknown protein; BEST Arabidopsis thaliana protein match is: unknown protein (TAIR:AT1G67910.2); Has 115 Blast hits to 115 proteins in 17 species: Archae - 0; Bacteria - 0; Metazoa - 0; Fungi - 0; Plants - 115; Viruses - 0; Other Eukaryotes - 0 (sou /.../CBI BLink). [Source:TAIR;Acc:AT1G24577]
AT2G27690	2.34336	CYP94C1	Cytochrome P450 94C1 [Source:UniProtKB/Swiss-Prot;Acc:Q9ZUX1]
AT5G06690	2.33627	WCRKC1	Thioredoxin-like 3-1, chloroplastic [Source:UniProtKB/Swiss-Prot;Acc:Q9FG36]
AT1G31200	2.32629	PP2A9	Protein PHLOEM PROTEIN 2-LIKE A9 [Source:UniProtKB/Swiss-Prot;Acc:Q9SA16]
AT4G38825	2.31118		SAUR-like auxin-responsive protein family [Source:TAIR;Acc:AT4G38825]
AT3G06020	2.30272	FAF4	Protein FANTASTIC FOUR 4 [Source:UniProtKB/Swiss-Prot;Acc:Q9SFG6]
AT5G39865	2.30029		Uncharacterized protein At5g39865 [Source:UniProtKB/Swiss-Prot;Acc:Q9FLE8]
AT2G25240	2.30022		Serpin-Z10 [Source:UniProtKB/Swiss-Prot;Acc:Q9SIR9]
AT1G04660	2.28565		glycine-rich protein [Source:TAIR;Acc:AT1G04660]
AT1G66950	2.28565	ABCG39	ABC transporter G family member 39 [Source:UniProtKB/Swiss-Prot;Acc:Q7PC84]
AT1G73600	2.28565	NMT3	Phosphoethanolamine N-methyltransferase 3 [Source:UniProtKB/Swiss-Prot;Acc:Q9C6B9]
AT2G28270	2.28565		Cysteine/Histidine-rich C1 domain family protein [Source:TAIR;Acc:AT2G28270]
AT3G62160	2.28565		HXXXD-type acyl-transferase family protein [Source:TAIR;Acc:AT3G62160]
AT1G05770	2.26489	JAL2	Jacalin-related lectin 2 [Source:UniProtKB/Swiss-Prot;Acc:Q9MA49]
AT4G18501	2.26489		unknown protein; Has 35333 Blast hits to 34131 proteins in 2444 species: Archae - 798; Bacteria - 22429; Metazoa - 974; Fungi - 991; Plants - 531; Viruses - 0; Other Eukaryotes - 9610 (source: NCBI BLink). [Source:TAIR;Acc:AT4G18501]
AT1G33090	2.23318		MATE efflux family protein [Source:TAIR;Acc:AT1G33090]
AT1G56555	2.23318		unknown protein; Has 2 Blast hits to 2 proteins in 1 species: Archae - 0; Bacteria - 0; Metazoa - 0; Fungi - 0; Plants - 2; Viruses - 0; Other Eukaryotes - 0 (source: NCBI BLink). [Source:TAIR;Acc:AT1G56555]
AT5G09976	2.23318		FUNCTIONS IN: molecular_function unknown; INVOLVED IN: biological_process unknown; LOCATED IN: cellular_component unknown; BEST Arabidopsis thaliana protein match is: precursor of peptide 1 (TAIR:AT5G64900.1); Has 19 Blast hits to 19 proteins in 2 s /.../: Archae - 0; Bacteria - 0; Metazoa - 0; Fungi - 0; Plants - 19; Viruses - 0; Other Eukaryotes - 0 (source: NCBI BLink). [Source:TAIR;Acc:AT5G09…
AT1G22710	2.21676	SUC2	Sucrose transport protein SUC2 [Source:UniProtKB/Swiss-Prot;Acc:Q39231]
AT5G04690	2.21009		Ankyrin repeat family protein [Source:TAIR;Acc:AT5G04690]
AT1G58370	2.20555	RXF12	glycosyl hydrolase family 10 protein / carbohydrate-binding domain-containing protein [Source:TAIR;Acc:AT1G58370]
AT2G15680	2.20373	CML1	Calmodulin-like protein 1 [Source:UniProtKB/Swiss-Prot;Acc:Q9ZQE6]
AT3G49960	2.18936	PER35	Peroxidase 35 [Source:UniProtKB/Swiss-Prot;Acc:Q96510]
AT1G21140	2.18524		Vacuolar iron transporter homolog 1 [Source:UniProtKB/Swiss-Prot;Acc:Q9LPU9]
AT1G25230	2.18299	PAP4	Purple acid phosphatase 4 [Source:UniProtKB/Swiss-Prot;Acc:Q8VYU7]
AT2G42870	2.17874	PAR1	Transcription factor PAR1 [Source:UniProtKB/Swiss-Prot;Acc:Q9SJH0]
AT4G24260	2.17872	KOR3	Endoglucanase 21 [Source:UniProtKB/Swiss-Prot;Acc:Q9STW8]
AT5G51330	2.17826	DYAD	Protein DYAD [Source:UniProtKB/Swiss-Prot;Acc:Q9FGN8]
AT5G22920	2.1737		CHY-type/CTCHY-type/RING-type Zinc finger protein [Source:TAIR;Acc:AT5G22920]
AT2G26400	2.17359	ARD1	1,2-dihydroxy-3-keto-5-methylthiopentene dioxygenase 1 [Source:UniProtKB/Swiss-Prot;Acc:O48707]
AT5G15581	2.16759		unknown protein; FUNCTIONS IN: molecular_function unknown; INVOLVED IN: biological_process unknown; LOCATED IN: cellular_component unknown; EXPRESSED IN: leaf apex; Has 30201 Blast hits to 17322 proteins in 780 species: Archae - 12; Bacteria - 1396; /.../oa - 17338; Fungi - 3422; Plants - 5037; Viruses - 0; Other Eukaryotes - 2996 (source: NCBI BLink). [Source:TAIR;Acc:AT5G15581]
AT1G33811	2.16325		GDSL esterase/lipase At1g33811 [Source:UniProtKB/Swiss-Prot;Acc:Q8L5Z1]
AT1G02190	2.15072		Protein CER1-like 1 [Source:UniProtKB/Swiss-Prot;Acc:F4HVX7]
AT1G13920	2.15072		Remorin family protein [Source:TAIR;Acc:AT1G13920]
AT3G07420	2.14667	SYNC2	Asparagine--tRNA ligase, cytoplasmic 2 [Source:UniProtKB/Swiss-Prot;Acc:Q9SW95]
AT4G14410	2.14025	BHLH104	Transcription factor bHLH104 [Source:UniProtKB/Swiss-Prot;Acc:Q8L467]
AT3G15450	2.1236		Aluminium induced protein with YGL and LRDR motifs [Source:TAIR;Acc:AT3G15450]
AT3G20450	2.12215		B-cell receptor-associated protein 31-like [Source:TAIR;Acc:AT3G20450]
AT4G01970	2.11388	RFS4	Probable galactinol--sucrose galactosyltransferase 4 [Source:UniProtKB/Swiss-Prot;Acc:Q9SYJ4]
AT4G02700	2.10955	SULTR3;2	Sulfate transporter 3.2 [Source:UniProtKB/Swiss-Prot;Acc:O04289]
AT5G20970	2.10278		HSP20-like chaperones superfamily protein [Source:TAIR;Acc:AT5G20970]
AT5G19580	2.093		glyoxal oxidase-related protein [Source:TAIR;Acc:AT5G19580]
AT3G03200	2.08925	NAC045	NAC domain-containing protein 45 [Source:UniProtKB/Swiss-Prot;Acc:A4VCM0]
AT4G12900	2.08922		Gamma interferon responsive lysosomal thiol (GILT) reductase family protein [Source:TAIR;Acc:AT4G12900]
AT3G20395	2.08792		RING/U-box superfamily protein [Source:TAIR;Acc:AT3G20395]
AT1G04110	2.08068	SBT1.2	Subtilisin-like protease SBT1.2 [Source:UniProtKB/Swiss-Prot;Acc:O64495]
AT3G26200	2.07752	CYP71B22	Cytochrome P450 71B22 [Source:UniProtKB/Swiss-Prot;Acc:Q9LTM1]
AT4G28500	2.07752	NAC073	NAC domain-containing protein 73 [Source:UniProtKB/Swiss-Prot;Acc:O49459]
AT4G08300	2.07579		WAT1-related protein At4g08300 [Source:UniProtKB/Swiss-Prot;Acc:Q501F8]
AT5G07080	2.07579		HXXXD-type acyl-transferase family protein [Source:TAIR;Acc:AT5G07080]
AT1G02640	2.07139	BXL2	Probable beta-D-xylosidase 2 [Source:UniProtKB/Swiss-Prot;Acc:Q94KD8]
AT1G03320	2.07061		unknown protein; Has 1038 Blast hits to 683 proteins in 112 species: Archae - 4; Bacteria - 14; Metazoa - 318; Fungi - 117; Plants - 86; Viruses - 8; Other Eukaryotes - 491 (source: NCBI BLink). [Source:TAIR;Acc:AT1G03320]
AT1G10800	2.07061		unknown protein; FUNCTIONS IN: molecular_function unknown; INVOLVED IN: biological_process unknown; LOCATED IN: endomembrane system; EXPRESSED IN: inflorescence meristem, hypocotyl, root, flower; EXPRESSED DURING: petal differentiation and expansion /.../; Has 23 Blast hits to 23 proteins in 9 species: Archae - 0; Bacteria - 0; Metazoa - 0; Fungi - 0; Plants - 22; Viruses - 0; Other Eukaryotes - …
AT1G12630	2.07061	ERF027	Ethylene-responsive transcription factor ERF027 [Source:UniProtKB/Swiss-Prot;Acc:Q38Q39]
AT1G24405	2.07061		unknown protein; FUNCTIONS IN: molecular_function unknown; INVOLVED IN: biological_process unknown; LOCATED IN: cellular_component unknown; BEST Arabidopsis thaliana protein match is: unknown protein (TAIR:AT1G67670.1); Has 30201 Blast hits to 17322 /.../ins in 780 species: Archae - 12; Bacteria - 1396; Metazoa - 17338; Fungi - 3422; Plants - 5037; Viruses - 0; Other Eukaryotes - 2996 (source: NC…
AT1G48660	2.07061		Auxin-responsive GH3 family protein [Source:TAIR;Acc:AT1G48660]
AT1G61415	2.07061		unknown protein; FUNCTIONS IN: molecular_function unknown; INVOLVED IN: biological_process unknown; LOCATED IN: cellular_component unknown; BEST Arabidopsis thaliana protein match is: unknown protein (TAIR:AT1G61450.1); Has 30201 Blast hits to 17322 /.../ins in 780 species: Archae - 12; Bacteria - 1396; Metazoa - 17338; Fungi - 3422; Plants - 5037; Viruses - 0; Other Eukaryotes - 2996 (source: NC…
AT2G21260	2.07061		NAD(P)-linked oxidoreductase superfamily protein [Source:TAIR;Acc:AT2G21260]
AT3G18840	2.07061	PCMP-E92	Putative pentatricopeptide repeat-containing protein At3g18840 [Source:UniProtKB/Swiss-Prot;Acc:Q9LHN5]
AT3G28150	2.07061	AXY4L	Protein ALTERED XYLOGLUCAN 4-like [Source:UniProtKB/Swiss-Prot;Acc:Q9LRS2]
AT3G43400	2.07061		ELMO/CED-12 family protein [Source:TAIR;Acc:AT3G43400]
AT4G09950	2.07061		P-loop containing nucleoside triphosphate hydrolases superfamily protein [Source:TAIR;Acc:AT4G09950]
AT5G24510	2.07061		60S acidic ribosomal protein family [Source:TAIR;Acc:AT5G24510]
AT5G26190	2.07061		Cysteine/Histidine-rich C1 domain family protein [Source:TAIR;Acc:AT5G26190]
AT5G38770	2.07061	GDU7	Protein GLUTAMINE DUMPER 7 [Source:UniProtKB/Swiss-Prot;Acc:Q3E8L0]
AT5G43240	2.07061		Protein of unknown function (DUF674) [Source:TAIR;Acc:AT5G43240]
AT5G47600	2.07061	HSP14.7	14.7 kDa heat shock protein [Source:UniProtKB/Swiss-Prot;Acc:Q6NLV0]
AT1G09750	2.07029		Eukaryotic aspartyl protease family protein [Source:TAIR;Acc:AT1G09750]
AT1G69325	2.07014		Remorin family protein [Source:TAIR;Acc:AT1G69325]
AT2G27035	2.07014	ENODL20	early nodulin-like protein 20 [Source:TAIR;Acc:AT2G27035]
AT5G01480	2.07014		Cysteine/Histidine-rich C1 domain family protein [Source:TAIR;Acc:AT5G01480]
AT5G53390	2.07014		O-acyltransferase (WSD1-like) family protein [Source:TAIR;Acc:AT5G53390]
AT4G19680	2.06603	IRT2	Fe(2+) transport protein 2 [Source:UniProtKB/Swiss-Prot;Acc:O81850]
AT1G69880	2.06581	TRX8	Thioredoxin H8 [Source:UniProtKB/Swiss-Prot;Acc:Q9CAS1]
AT1G63310	2.06448		unknown protein; BEST Arabidopsis thaliana protein match is: unknown protein (TAIR:AT2G20362.1); Has 78 Blast hits to 77 proteins in 11 species: Archae - 0; Bacteria - 0; Metazoa - 0; Fungi - 0; Plants - 78; Viruses - 0; Other Eukaryotes - 0 (source /.../ BLink). [Source:TAIR;Acc:AT1G63310]
AT1G03445	2.06325	BSU1	Serine/threonine-protein phosphatase BSU1 [Source:UniProtKB/Swiss-Prot;Acc:Q9LR78]
AT1G06170	2.06325	BHLH89	Transcription factor bHLH89 [Source:UniProtKB/Swiss-Prot;Acc:Q9LND0]
AT1G08430	2.06325	ALMT1	Aluminum-activated malate transporter 1 [Source:UniProtKB/Swiss-Prot;Acc:Q9SJE9]
AT1G11490	2.06325		zinc finger (C2H2 type) family protein [Source:TAIR;Acc:AT1G11490]
AT1G12490	2.06325		F-box associated ubiquitination effector family protein [Source:TAIR;Acc:AT1G12490]
AT1G18990	2.06325	MYOB5	Probable myosin-binding protein 5 [Source:UniProtKB/Swiss-Prot;Acc:Q9LMC8]
AT1G22290	2.06325		14-3-3 family protein [Source:TAIR;Acc:AT1G22290]
AT1G58300	2.06325	HO4	Heme oxygenase 4, chloroplastic [Source:UniProtKB/Swiss-Prot;Acc:Q9LQC0]
AT1G68700	2.06325		unknown protein; BEST Arabidopsis thaliana protein match is: unknown protein (TAIR:AT1G26140.1); Has 14 Blast hits to 14 proteins in 4 species: Archae - 0; Bacteria - 0; Metazoa - 0; Fungi - 0; Plants - 14; Viruses - 0; Other Eukaryotes - 0 (source: /.../BLink). [Source:TAIR;Acc:AT1G68700]
AT1G71770	2.06325	PAB5	Polyadenylate-binding protein 5 [Source:UniProtKB/Swiss-Prot;Acc:Q05196]
AT1G75360	2.06325		unknown protein; Has 74 Blast hits to 71 proteins in 15 species: Archae - 0; Bacteria - 4; Metazoa - 4; Fungi - 0; Plants - 54; Viruses - 0; Other Eukaryotes - 12 (source: NCBI BLink). [Source:TAIR;Acc:AT1G75360]
AT2G02250	2.06325	PP2B2	Putative F-box protein PP2-B2 [Source:UniProtKB/Swiss-Prot;Acc:Q9ZVR5]
AT2G04190	2.06325		TRAF-like family protein [Source:TAIR;Acc:AT2G04190]
AT2G07667	2.06325		unknown protein; FUNCTIONS IN: molecular_function unknown; INVOLVED IN: biological_process unknown; LOCATED IN: mitochondrion; BEST Arabidopsis thaliana protein match is: unknown protein (TAIR:ATMG01180.1); Has 3 Blast hits to 3 proteins in 1 specie /.../hae - 0; Bacteria - 0; Metazoa - 0; Fungi - 0; Plants - 3; Viruses - 0; Other Eukaryotes - 0 (source: NCBI BLink). [Source:TAIR;Acc:AT2G07667]
AT2G35200	2.06325		unknown protein; BEST Arabidopsis thaliana protein match is: unknown protein (TAIR:AT1G32690.1); Has 36 Blast hits to 36 proteins in 8 species: Archae - 0; Bacteria - 0; Metazoa - 0; Fungi - 0; Plants - 36; Viruses - 0; Other Eukaryotes - 0 (source: /.../BLink). [Source:TAIR;Acc:AT2G35200]
AT2G36640	2.06325	ATECP63	embryonic cell protein 63 [Source:TAIR;Acc:AT2G36640]
AT2G39920	2.06325		Uncharacterized protein At2g39920 [Source:UniProtKB/Swiss-Prot;Acc:O04195]
AT2G42820	2.06325	HVA22F	HVA22-like protein f [Source:UniProtKB/Swiss-Prot;Acc:Q682H0]
AT2G46840	2.06325	ATDUF4	DOMAIN OF UNKNOWN FUNCTION 724 4 [Source:TAIR;Acc:AT2G46840]
AT3G01345	2.06325		Expressed protein [Source:TAIR;Acc:AT3G01345]
AT3G05720	2.06325	IMPA7	Importin subunit alpha-7 [Source:UniProtKB/Swiss-Prot;Acc:Q9M9X7]
AT3G13280	2.06325		Putative endonuclease or glycosyl hydrolase [Source:TAIR;Acc:AT3G13280]
AT3G20557	2.06325		unknown protein; BEST Arabidopsis thaliana protein match is: unknown protein (TAIR:AT1G50930.1); Has 35333 Blast hits to 34131 proteins in 2444 species: Archae - 798; Bacteria - 22429; Metazoa - 974; Fungi - 991; Plants - 531; Viruses - 0; Other Euk /.../s - 9610 (source: NCBI BLink). [Source:TAIR;Acc:AT3G20557]
AT3G28580	2.06325		P-loop containing nucleoside triphosphate hydrolases superfamily protein [Source:TAIR;Acc:AT3G28580]
AT3G46810	2.06325		Cysteine/Histidine-rich C1 domain family protein [Source:TAIR;Acc:AT3G46810]
AT3G50310	2.06325	MAPKKK20	mitogen-activated protein kinase kinase kinase 20 [Source:TAIR;Acc:AT3G50310]
AT3G59440	2.06325	CML4	Calmodulin-like protein 4 [Source:UniProtKB/Swiss-Prot;Acc:Q9LX27]
AT4G00210	2.06325	LBD31	LOB domain-containing protein 31 [Source:UniProtKB/Swiss-Prot;Acc:O81322]
AT4G01930	2.06325		Cysteine/Histidine-rich C1 domain family protein [Source:TAIR;Acc:AT4G01930]
AT4G10160	2.06325	ATL59	E3 ubiquitin-protein ligase ATL59 [Source:UniProtKB/Swiss-Prot;Acc:Q9SN27]
AT4G13450	2.06325		Adenine nucleotide alpha hydrolases-like superfamily protein [Source:TAIR;Acc:AT4G13450]
AT4G27530	2.06325		unknown protein; BEST Arabidopsis thaliana protein match is: unknown protein (TAIR:AT5G53895.1); Has 14 Blast hits to 14 proteins in 3 species: Archae - 0; Bacteria - 0; Metazoa - 0; Fungi - 0; Plants - 14; Viruses - 0; Other Eukaryotes - 0 (source: /.../BLink). [Source:TAIR;Acc:AT4G27530]
AT4G27810	2.06325		unknown protein; CONTAINS InterPro DOMAIN/s: Protein of unknown function DUF688 (InterPro:IPR007789); BEST Arabidopsis thaliana protein match is: unknown protein (TAIR:AT5G53030.1); Has 73 Blast hits to 66 proteins in 11 species: Archae - 0; Bacteri /.../ Metazoa - 0; Fungi - 0; Plants - 73; Viruses - 0; Other Eukaryotes - 0 (source: NCBI BLink). [Source:TAIR;Acc:AT4G27810]
AT4G35970	2.06325	APX5	L-ascorbate peroxidase 5, peroxisomal [Source:UniProtKB/Swiss-Prot;Acc:Q7XZP5]
AT4G36100	2.06325		Sec1/munc18-like (SM) proteins superfamily [Source:TAIR;Acc:AT4G36100]
AT5G09470	2.06325	PUMP6	Mitochondrial uncoupling protein 6 [Source:UniProtKB/Swiss-Prot;Acc:Q9FY68]
AT5G14110	2.06325		Protein of unknown function (DUF 3339) [Source:TAIR;Acc:AT5G14110]
AT5G28340	2.06325		Tetratricopeptide repeat (TPR)-like superfamily protein [Source:TAIR;Acc:AT5G28340]
AT5G42610	2.06325		Calcium uniporter protein 4, mitochondrial [Source:UniProtKB/Swiss-Prot;Acc:Q9FJV7]
AT5G43610	2.06325	SUC6	Putative sucrose transport protein SUC6 [Source:UniProtKB/Swiss-Prot;Acc:Q6A329]
AT5G57690	2.06325	DGK4	Diacylglycerol kinase 4 [Source:UniProtKB/Swiss-Prot;Acc:Q1PDI2]
AT5G62040	2.06325	BFT	Protein BROTHER of FT and TFL 1 [Source:UniProtKB/Swiss-Prot;Acc:Q9FIT4]
AT3G10600	2.06325	CAT7	Cationic amino acid transporter 7, chloroplastic [Source:UniProtKB/Swiss-Prot;Acc:Q9SQZ0]
AT1G06350	2.06273		Delta-9 desaturase-like 4 protein [Source:UniProtKB/Swiss-Prot;Acc:Q9LMI4]
AT5G06640	2.06162		Proline-rich extensin-like family protein [Source:TAIR;Acc:AT5G06640]
ATCG00770	2.05942	RPS8	30S ribosomal protein S8, chloroplastic [Source:UniProtKB/Swiss-Prot;Acc:P56801]
AT3G49070	2.0568		UPF0496 protein At3g49070 [Source:UniProtKB/Swiss-Prot;Acc:Q9SMU4]
AT1G67790	2.05467		unknown protein; BEST Arabidopsis thaliana protein match is: unknown protein (TAIR:AT3G01680.1); Has 208 Blast hits to 125 proteins in 13 species: Archae - 0; Bacteria - 0; Metazoa - 0; Fungi - 0; Plants - 208; Viruses - 0; Other Eukaryotes - 0 (sou /.../CBI BLink). [Source:TAIR;Acc:AT1G67790]
AT2G34655	2.05175		unknown protein; FUNCTIONS IN: molecular_function unknown; INVOLVED IN: biological_process unknown; LOCATED IN: endomembrane system; EXPRESSED IN: stem, root, inflorescence, cultured cell, leaf; Has 35333 Blast hits to 34131 proteins in 2444 species /.../ae - 798; Bacteria - 22429; Metazoa - 974; Fungi - 991; Plants - 531; Viruses - 0; Other Eukaryotes - 9610 (source: NCBI BLink). [Source:TAIR;Ac…
AT2G18328	2.04789	RL4	Protein RADIALIS-like 4 [Source:UniProtKB/Swiss-Prot;Acc:Q1G3C4]
AT3G58350	2.04752	RTM3	Protein RESTRICTED TEV MOVEMENT 3 [Source:UniProtKB/Swiss-Prot;Acc:D5K228]
AT5G01930	2.04347	MAN6	Mannan endo-1,4-beta-mannosidase 6 [Source:UniProtKB/Swiss-Prot;Acc:Q9LZV3]
AT4G01430	2.04223		WAT1-related protein At4g01430 [Source:UniProtKB/Swiss-Prot;Acc:Q9M131]
AT2G01275	2.04086		RING/FYVE/PHD zinc finger superfamily protein [Source:TAIR;Acc:AT2G01275]
AT1G16390	2.03954	42646	Organic cation/carnitine transporter 3 [Source:UniProtKB/Swiss-Prot;Acc:Q9SA38]
AT4G05220	2.0377		Late embryogenesis abundant (LEA) hydroxyproline-rich glycoprotein family [Source:TAIR;Acc:AT4G05220]
AT2G20875	2.0377	EPF1	Protein EPIDERMAL PATTERNING FACTOR 1 [Source:UniProtKB/Swiss-Prot;Acc:Q8S8I4]
AT1G34580	2.03584	STP5	Sugar transport protein 5 [Source:UniProtKB/Swiss-Prot;Acc:Q93Y91]
AT5G54060	2.03584	A3G2XYLT	Anthocyanidin 3-O-glucoside 2'''-O-xylosyltransferase [Source:UniProtKB/Swiss-Prot;Acc:Q9LVW3]
AT4G27440	2.03342	PORB	Protochlorophyllide reductase B, chloroplastic [Source:UniProtKB/Swiss-Prot;Acc:P21218]
AT1G31720	2.03026		Protein of unknown function (DUF1218) [Source:TAIR;Acc:AT1G31720]
AT2G24980	2.02879		Proline-rich extensin-like family protein [Source:TAIR;Acc:AT2G24980]
AT2G41610	2.02879		unknown protein; Has 35333 Blast hits to 34131 proteins in 2444 species: Archae - 798; Bacteria - 22429; Metazoa - 974; Fungi - 991; Plants - 531; Viruses - 0; Other Eukaryotes - 9610 (source: NCBI BLink). [Source:TAIR;Acc:AT2G41610]
AT3G60670	2.02879		PLATZ transcription factor family protein [Source:TAIR;Acc:AT3G60670]
AT5G03350	2.0283		Lectin-like protein At5g03350 [Source:UniProtKB/Swiss-Prot;Acc:Q9LZF5]
AT1G19620	2.02673		unknown protein; Has 44 Blast hits to 24 proteins in 12 species: Archae - 0; Bacteria - 8; Metazoa - 22; Fungi - 0; Plants - 6; Viruses - 0; Other Eukaryotes - 8 (source: NCBI BLink). [Source:TAIR;Acc:AT1G19620]
AT4G34790	2.02575		SAUR-like auxin-responsive protein family [Source:TAIR;Acc:AT4G34790]
AT4G28850	2.02123	XTH26	Probable xyloglucan endotransglucosylase/hydrolase protein 26 [Source:UniProtKB/Swiss-Prot;Acc:Q9SVV2]
AT2G26695	2.02047		Ran BP2/NZF zinc finger-like superfamily protein [Source:TAIR;Acc:AT2G26695]
AT3G26125	2.01814	CYP86C2	cytochrome P450, family 86, subfamily C, polypeptide 2 [Source:TAIR;Acc:AT3G26125]
AT2G30010	2.01371	TBL45	Protein trichome birefringence-like 45 [Source:UniProtKB/Swiss-Prot;Acc:O80872]
AT3G01680	2.01149	SEOB	Protein SIEVE ELEMENT OCCLUSION B [Source:UniProtKB/Swiss-Prot;Acc:Q9SS87]
AT1G16022	2.01125		unknown protein; FUNCTIONS IN: molecular_function unknown; INVOLVED IN: biological_process unknown; LOCATED IN: endomembrane system; Has 30201 Blast hits to 17322 proteins in 780 species: Archae - 12; Bacteria - 1396; Metazoa - 17338; Fungi - 3422; /.../ - 5037; Viruses - 0; Other Eukaryotes - 2996 (source: NCBI BLink). [Source:TAIR;Acc:AT1G16022]
AT3G06435	2.01125		Expressed protein [Source:TAIR;Acc:AT3G06435]
AT5G45830	2.01125	DOG1	delay of germination 1 [Source:TAIR;Acc:AT5G45830]
AT4G16008	2.00881		unknown protein; FUNCTIONS IN: molecular_function unknown; INVOLVED IN: biological_process unknown; LOCATED IN: cellular_component unknown; Has 30201 Blast hits to 17322 proteins in 780 species: Archae - 12; Bacteria - 1396; Metazoa - 17338; Fungi - /.../ Plants - 5037; Viruses - 0; Other Eukaryotes - 2996 (source: NCBI BLink). [Source:TAIR;Acc:AT4G16008]
AT4G17030	2.00206	EXLB1	Expansin-like B1 [Source:UniProtKB/Swiss-Prot;Acc:O23547]
AT5G48690	2.00185		CONTAINS InterPro DOMAIN/s: Ubiquitin-associated/translation elongation factor EF1B, N-terminal, eukaryote (InterPro:IPR015940), PUB domain (InterPro:IPR018997), PUG domain (InterPro:IPR006567), UBA-like (InterPro:IPR009060); BEST Arabidopsis thalia /.../tein match is: ubiquitin-associated (UBA)/TS-N domain-containing protein (TAIR:AT1G04850.1); Has 7001 Blast hits to 5165 proteins in 492 species…
AT1G10790	2.00022		BEST Arabidopsis thaliana protein match is: hydroxyproline-rich glycoprotein family protein (TAIR:AT3G56590.2); Has 78 Blast hits to 78 proteins in 11 species: Archae - 0; Bacteria - 0; Metazoa - 0; Fungi - 0; Plants - 78; Viruses - 0; Other Eukaryo /.../0 (source: NCBI BLink). [Source:TAIR;Acc:AT1G10790]
AT1G51055	2.00022		FBD-like domain family protein [Source:TAIR;Acc:AT1G51055]
AT1G75250	2.00022	RL6	Protein RADIALIS-like 6 [Source:UniProtKB/Swiss-Prot;Acc:Q1A173]
AT3G52525	2.00022	OFP6	Transcription repressor OFP6 [Source:UniProtKB/Swiss-Prot;Acc:Q3EAL1]
AT4G22680	2.00022	MYB85	myb domain protein 85 [Source:TAIR;Acc:AT4G22680]
AT4G25790	2.00022		CAP (Cysteine-rich secretory proteins, Antigen 5, and Pathogenesis-related 1 protein) superfamily protein [Source:TAIR;Acc:AT4G25790]
AT5G10760	2.00022		Eukaryotic aspartyl protease family protein [Source:TAIR;Acc:AT5G10760]
AT5G48050	2.00022		CONTAINS InterPro DOMAIN/s: Retrotransposon gag protein (InterPro:IPR005162); BEST Arabidopsis thaliana protein match is: unknown protein (TAIR:AT1G34070.1); Has 1807 Blast hits to 1807 proteins in 277 species: Archae - 0; Bacteria - 0; Metazoa - 73 /.../gi - 347; Plants - 385; Viruses - 0; Other Eukaryotes - 339 (source: NCBI BLink). [Source:TAIR;Acc:AT5G48050]
ATCG00360	2.00022	YCF3	Tetratricopeptide repeat (TPR)-like superfamily protein [Source:TAIR;Acc:ATCG00360]
AT1G23020	-2.00103	FRO3	Ferric reduction oxidase 3, mitochondrial [Source:UniProtKB/Swiss-Prot;Acc:F4I4K7]
AT3G50970	-2.00139	XERO2	Dehydrin Xero 2 [Source:UniProtKB/Swiss-Prot;Acc:P42758]
AT1G35515	-2.00198	HOS10	high response to osmotic stress 10 [Source:TAIR;Acc:AT1G35515]
AT4G15490	-2.0021	UGT84A3	UDP-glycosyltransferase 84A3 [Source:UniProtKB/Swiss-Prot;Acc:O23401]
AT1G31050	-2.00228	BHLH111	basic helix-loop-helix (bHLH) DNA-binding superfamily protein [Source:TAIR;Acc:AT1G31050]
AT1G22065	-2.00253		unknown protein; FUNCTIONS IN: molecular_function unknown; INVOLVED IN: biological_process unknown; LOCATED IN: cellular_component unknown; BEST Arabidopsis thaliana protein match is: unknown protein (TAIR:AT1G77885.1); Has 30201 Blast hits to 17322 /.../ins in 780 species: Archae - 12; Bacteria - 1396; Metazoa - 17338; Fungi - 3422; Plants - 5037; Viruses - 0; Other Eukaryotes - 2996 (source: NC…
AT2G19900	-2.00253	NADP-ME1	NADP-dependent malic enzyme 1 [Source:UniProtKB/Swiss-Prot;Acc:O82191]
AT5G24660	-2.00294	LSU2	response to low sulfur 2 [Source:TAIR;Acc:AT5G24660]
AT5G13170	-2.0032	SWEET15	Bidirectional sugar transporter SWEET15 [Source:UniProtKB/Swiss-Prot;Acc:Q9FY94]
AT1G68850	-2.00714	PER11	Peroxidase 11 [Source:UniProtKB/Swiss-Prot;Acc:Q96519]
AT1G70440	-2.00714	SRO3	Probable inactive poly [ADP-ribose] polymerase SRO3 [Source:UniProtKB/Swiss-Prot;Acc:O64592]
AT5G24240	-2.00714	PI4KG3	Phosphatidylinositol 4-kinase gamma 3 [Source:UniProtKB/Swiss-Prot;Acc:Q9FNF8]
AT2G42850	-2.0076	CYP718	cytochrome P450, family 718 [Source:TAIR;Acc:AT2G42850]
AT4G27410	-2.00874	NAC072	NAC domain-containing protein 72 [Source:UniProtKB/Swiss-Prot;Acc:Q93VY3]
AT2G48140	-2.00918	EDA4	Bifunctional inhibitor/lipid-transfer protein/seed storage 2S albumin superfamily protein [Source:TAIR;Acc:AT2G48140]
AT1G01560	-2.01122	MPK11	Mitogen-activated protein kinase 11 [Source:UniProtKB/Swiss-Prot;Acc:Q9LMM5]
AT1G23560	-2.01122		Domain of unknown function (DUF220) [Source:TAIR;Acc:AT1G23560]
AT1G32960	-2.01122	SBT3.3	Subtilisin-like protease SBT3.3 [Source:UniProtKB/Swiss-Prot;Acc:Q9MAP5]
AT2G05180	-2.01122	CYP705A6	cytochrome P450, family 705, subfamily A, polypeptide 6 [Source:TAIR;Acc:AT2G05180]
AT3G46400	-2.01122		Leucine-rich repeat protein kinase family protein [Source:TAIR;Acc:AT3G46400]
AT5G36110	-2.01122	CYP716A1	cytochrome P450, family 716, subfamily A, polypeptide 1 [Source:TAIR;Acc:AT5G36110]
AT5G41040	-2.01146	HHT1	Omega-hydroxypalmitate O-feruloyl transferase [Source:UniProtKB/Swiss-Prot;Acc:Q94CD1]
AT2G15490	-2.01271	UGT73B4	UDP-glycosyltransferase 73B4 [Source:UniProtKB/Swiss-Prot;Acc:Q7Y232]
AT5G13080	-2.01403	WRKY75	Probable WRKY transcription factor 75 [Source:UniProtKB/Swiss-Prot;Acc:Q9FYA2]
AT5G52310	-2.01492	LTI78	Low-temperature-induced 78 kDa protein [Source:UniProtKB/Swiss-Prot;Acc:Q06738]
AT3G50260	-2.0186	ERF011	Ethylene-responsive transcription factor ERF011 [Source:UniProtKB/Swiss-Prot;Acc:Q9SNE1]
AT3G47220	-2.01947	PLC9	Phosphoinositide phospholipase C 9 [Source:UniProtKB/Swiss-Prot;Acc:Q6NMA7]
AT4G25400	-2.02023	BHLH118	Transcription factor bHLH118 [Source:UniProtKB/Swiss-Prot;Acc:Q9STJ7]
AT5G37550	-2.02098		unknown protein; BEST Arabidopsis thaliana protein match is: unknown protein (TAIR:AT1G66190.1); Has 1807 Blast hits to 1807 proteins in 277 species: Archae - 0; Bacteria - 0; Metazoa - 736; Fungi - 347; Plants - 385; Viruses - 0; Other Eukaryotes - /.../source: NCBI BLink). [Source:TAIR;Acc:AT5G37550]
AT5G24230	-2.02164		Lipase class 3-related protein [Source:TAIR;Acc:AT5G24230]
AT1G68825	-2.02421	DVL5	ROTUNDIFOLIA like 15 [Source:TAIR;Acc:AT1G68825]
AT1G76960	-2.02421		unknown protein; FUNCTIONS IN: molecular_function unknown; INVOLVED IN: biological_process unknown; LOCATED IN: endomembrane system; EXPRESSED IN: 9 plant structures; EXPRESSED DURING: 8 growth stages; Has 8 Blast hits to 8 proteins in 2 species: Ar /.../ 0; Bacteria - 0; Metazoa - 0; Fungi - 0; Plants - 8; Viruses - 0; Other Eukaryotes - 0 (source: NCBI BLink). [Source:TAIR;Acc:AT1G76960]
AT2G30760	-2.02421		unknown protein; Has 3 Blast hits to 3 proteins in 2 species: Archae - 0; Bacteria - 0; Metazoa - 0; Fungi - 0; Plants - 3; Viruses - 0; Other Eukaryotes - 0 (source: NCBI BLink). [Source:TAIR;Acc:AT2G30760]
AT4G02090	-2.02421		unknown protein; FUNCTIONS IN: molecular_function unknown; INVOLVED IN: N-terminal protein myristoylation; LOCATED IN: cellular_component unknown; EXPRESSED IN: root; Has 132 Blast hits to 132 proteins in 12 species: Archae - 0; Bacteria - 0; Metazo /.../ Fungi - 0; Plants - 132; Viruses - 0; Other Eukaryotes - 0 (source: NCBI BLink). [Source:TAIR;Acc:AT4G02090]
AT5G14340	-2.02421	AtMYB40	myb domain protein 40 [Source:TAIR;Acc:AT5G14340]
AT5G42590	-2.02421	CYP71A16	Cytochrome P450 71A16 [Source:UniProtKB/Swiss-Prot;Acc:Q9FH66]
AT5G07475	-2.02426		Cupredoxin superfamily protein [Source:TAIR;Acc:AT5G07475]
AT4G12330	-2.02427	CYP706A7	cytochrome P450, family 706, subfamily A, polypeptide 7 [Source:TAIR;Acc:AT4G12330]
AT4G37340	-2.02427	CYP81D3	cytochrome P450, family 81, subfamily D, polypeptide 3 [Source:TAIR;Acc:AT4G37340]
AT1G70850	-2.02902	MLP34	MLP-like protein 34 [Source:UniProtKB/Swiss-Prot;Acc:Q9SSK7]
AT1G66090	-2.02983		Disease resistance protein (TIR-NBS class) [Source:TAIR;Acc:AT1G66090]
AT2G05540	-2.03411		Glycine-rich protein family [Source:TAIR;Acc:AT2G05540]
AT3G22600	-2.03422		Bifunctional inhibitor/lipid-transfer protein/seed storage 2S albumin superfamily protein [Source:TAIR;Acc:AT3G22600]
AT2G27430	-2.03487		ARM repeat superfamily protein [Source:TAIR;Acc:AT2G27430]
AT3G44540	-2.03487	FAR4	Probable fatty acyl-CoA reductase 4 [Source:UniProtKB/Swiss-Prot;Acc:Q9LXN3]
AT3G55970	-2.03487	ATJRG21	jasmonate-regulated gene 21 [Source:TAIR;Acc:AT3G55970]
AT5G49350	-2.03487		Glycine-rich protein family [Source:TAIR;Acc:AT5G49350]
AT2G22510	-2.03628		hydroxyproline-rich glycoprotein family protein [Source:TAIR;Acc:AT2G22510]
AT5G59940	-2.03628		Cysteine/Histidine-rich C1 domain family protein [Source:TAIR;Acc:AT5G59940]
AT1G02980	-2.03675	CUL2	Cullin-2 [Source:UniProtKB/Swiss-Prot;Acc:Q9SRZ0]
AT1G06930	-2.03675		unknown protein; Has 4478 Blast hits to 355 proteins in 82 species: Archae - 0; Bacteria - 29; Metazoa - 379; Fungi - 125; Plants - 120; Viruses - 25; Other Eukaryotes - 3800 (source: NCBI BLink). [Source:TAIR;Acc:AT1G06930]
AT1G15190	-2.03675	FLA19	Fasciclin-like arabinogalactan protein 19 [Source:UniProtKB/Swiss-Prot;Acc:Q5Q0H2]
AT1G23070	-2.03675		Protein LAZ1 homolog 2 [Source:UniProtKB/Swiss-Prot;Acc:Q5BPZ5]
AT1G26870	-2.03675	FEZ	NAC (No Apical Meristem) domain transcriptional regulator superfamily protein [Source:TAIR;Acc:AT1G26870]
AT1G51260	-2.03675	LPAT3	1-acyl-sn-glycerol-3-phosphate acyltransferase 3 [Source:UniProtKB/Swiss-Prot;Acc:Q9SYC8]
AT1G52110	-2.03675		Mannose-binding lectin superfamily protein [Source:TAIR;Acc:AT1G52110]
AT1G61440	-2.03675		G-type lectin S-receptor-like serine/threonine-protein kinase At1g61440 [Source:UniProtKB/Swiss-Prot;Acc:O64776]
AT1G62580	-2.03675		Flavin-binding monooxygenase family protein [Source:TAIR;Acc:AT1G62580]
AT1G78840	-2.03675		Putative F-box/FBD/LRR-repeat protein At1g78840 [Source:UniProtKB/Swiss-Prot;Acc:Q9ZVA3]
AT2G13810	-2.03675	ALD1	Aminotransferase ALD1 [Source:UniProtKB/Swiss-Prot;Acc:Q9ZQI7]
AT2G35380	-2.03675	PER20	Peroxidase 20 [Source:UniProtKB/Swiss-Prot;Acc:Q9SLH7]
AT2G38340	-2.03675	DREB2E	Dehydration-responsive element-binding protein 2E [Source:UniProtKB/Swiss-Prot;Acc:O80917]
AT2G39030	-2.03675	NATA1	L-ornithine N5-acetyltransferase NATA1 [Source:UniProtKB/Swiss-Prot;Acc:Q9ZV05]
AT2G46495	-2.03675	ATL21A	Putative RING-H2 finger protein ATL21A [Source:UniProtKB/Swiss-Prot;Acc:P0CH01]
AT3G01900	-2.03675	CYP94B2	cytochrome P450, family 94, subfamily B, polypeptide 2 [Source:TAIR;Acc:AT3G01900]
AT3G02242	-2.03675		unknown protein; FUNCTIONS IN: molecular_function unknown; INVOLVED IN: biological_process unknown; LOCATED IN: endomembrane system; BEST Arabidopsis thaliana protein match is: unknown protein (TAIR:AT3G02240.1); Has 30201 Blast hits to 17322 protei /.../780 species: Archae - 12; Bacteria - 1396; Metazoa - 17338; Fungi - 3422; Plants - 5037; Viruses - 0; Other Eukaryotes - 2996 (source: NCBI BLin…
AT3G03480	-2.03675	CHAT	(Z)-3-hexen-1-ol acetyltransferase [Source:UniProtKB/Swiss-Prot;Acc:Q9SRQ2]
AT3G14395	-2.03675		unknown protein; Has 4 Blast hits to 4 proteins in 2 species: Archae - 0; Bacteria - 0; Metazoa - 0; Fungi - 0; Plants - 4; Viruses - 0; Other Eukaryotes - 0 (source: NCBI BLink). [Source:TAIR;Acc:AT3G14395]
AT3G15370	-2.03675	EXPA12	Expansin-A12 [Source:UniProtKB/Swiss-Prot;Acc:Q9LDJ3]
AT3G22830	-2.03675	HSFA6B	Heat stress transcription factor A-6b [Source:UniProtKB/Swiss-Prot;Acc:Q9LUH8]
AT3G24650	-2.03675	ABI3	B3 domain-containing transcription factor ABI3 [Source:UniProtKB/Swiss-Prot;Acc:Q01593]
AT4G01230	-2.03675	RTNLB7	Reticulon family protein [Source:TAIR;Acc:AT4G01230]
AT4G08868	-2.03675		unknown protein; Has 35333 Blast hits to 34131 proteins in 2444 species: Archae - 798; Bacteria - 22429; Metazoa - 974; Fungi - 991; Plants - 531; Viruses - 0; Other Eukaryotes - 9610 (source: NCBI BLink). [Source:TAIR;Acc:AT4G08868]
AT4G09100	-2.03675	ATL39	RING-H2 finger protein ATL39 [Source:UniProtKB/Swiss-Prot;Acc:Q9M0R7]
AT4G09130	-2.03675	ATL37	Putative RING-H2 finger protein ATL37 [Source:UniProtKB/Swiss-Prot;Acc:Q9M0R4]
AT4G19980	-2.03675		unknown protein; FUNCTIONS IN: molecular_function unknown; INVOLVED IN: biological_process unknown; LOCATED IN: chloroplast; EXPRESSED IN: root, pedicel; EXPRESSED DURING: 4 anthesis; Has 30201 Blast hits to 17322 proteins in 780 species: Archae - 1 /.../teria - 1396; Metazoa - 17338; Fungi - 3422; Plants - 5037; Viruses - 0; Other Eukaryotes - 2996 (source: NCBI BLink). [Source:TAIR;Acc:AT4G1998…
AT4G25670	-2.03675		unknown protein; BEST Arabidopsis thaliana protein match is: unknown protein (TAIR:AT4G25690.2); Has 30201 Blast hits to 17322 proteins in 780 species: Archae - 12; Bacteria - 1396; Metazoa - 17338; Fungi - 3422; Plants - 5037; Viruses - 0; Other Eu /.../es - 2996 (source: NCBI BLink). [Source:TAIR;Acc:AT4G25670]
AT4G28140	-2.03675	ERF054	Ethylene-responsive transcription factor ERF054 [Source:UniProtKB/Swiss-Prot;Acc:Q9M0J3]
AT4G35010	-2.03675	BGAL11	Beta-galactosidase 11 [Source:UniProtKB/Swiss-Prot;Acc:Q9SCV1]
AT4G35190	-2.03675	LOG5	Cytokinin riboside 5'-monophosphate phosphoribohydrolase LOG5 [Source:UniProtKB/Swiss-Prot;Acc:Q8LBB7]
AT5G01225	-2.03675		unknown protein; BEST Arabidopsis thaliana protein match is: unknown protein (TAIR:AT3G09032.1); Has 30201 Blast hits to 17322 proteins in 780 species: Archae - 12; Bacteria - 1396; Metazoa - 17338; Fungi - 3422; Plants - 5037; Viruses - 0; Other Eu /.../es - 2996 (source: NCBI BLink). [Source:TAIR;Acc:AT5G01225]
AT5G02580	-2.03675		Plant protein 1589 of unknown function [Source:TAIR;Acc:AT5G02580]
AT5G07610	-2.03675		F-box protein At5g07610 [Source:UniProtKB/Swiss-Prot;Acc:Q9FLS0]
AT5G10410	-2.03675		Putative clathrin assembly protein At5g10410 [Source:UniProtKB/Swiss-Prot;Acc:Q8H0W9]
AT5G28080	-2.03675	WNK9	Probable serine/threonine-protein kinase WNK9 [Source:UniProtKB/Swiss-Prot;Acc:Q2V338]
AT5G38344	-2.03675		Toll-Interleukin-Resistance (TIR) domain family protein [Source:TAIR;Acc:AT5G38344]
AT5G41090	-2.03675	anac095	NAC domain containing protein 95 [Source:TAIR;Acc:AT5G41090]
AT5G37990	-2.0373		S-adenosyl-L-methionine-dependent methyltransferases superfamily protein [Source:TAIR;Acc:AT5G37990]
AT3G13610	-2.03774	F6'H1	Feruloyl CoA ortho-hydroxylase 1 [Source:UniProtKB/Swiss-Prot;Acc:Q9LHN8]
AT3G22840	-2.0413	ELIP1	Early light-induced protein 1, chloroplastic [Source:UniProtKB/Swiss-Prot;Acc:P93735]
AT3G54420	-2.04267	ATEP3	homolog of carrot EP3-3 chitinase [Source:TAIR;Acc:AT3G54420]
AT5G45070	-2.0436	PP2A8	Protein PHLOEM PROTEIN 2-LIKE A8 [Source:UniProtKB/Swiss-Prot;Acc:Q9FHE9]
AT1G53660	-2.04364		Probable sugar phosphate/phosphate translocator At1g53660 [Source:UniProtKB/Swiss-Prot;Acc:Q9C8M1]
AT3G49380	-2.04364	iqd15	IQ-domain 15 [Source:TAIR;Acc:AT3G49380]
AT4G27657	-2.04364		unknown protein; FUNCTIONS IN: molecular_function unknown; INVOLVED IN: biological_process unknown; LOCATED IN: endomembrane system; EXPRESSED IN: 15 plant structures; EXPRESSED DURING: 9 growth stages; BEST Arabidopsis thaliana protein match is: un /.../protein (TAIR:AT5G54145.1); Has 30201 Blast hits to 17322 proteins in 780 species: Archae - 12; Bacteria - 1396; Metazoa - 17338; Fungi - 3422; …
AT5G42380	-2.04364	CML37	Calcium-binding protein CML37 [Source:UniProtKB/Swiss-Prot;Acc:Q9FIH9]
AT5G55110	-2.04364		Stigma-specific STIG1-like protein 2 [Source:UniProtKB/Swiss-Prot;Acc:Q9FLQ0]
AT2G23540	-2.04455		GDSL esterase/lipase At2g23540 [Source:UniProtKB/Swiss-Prot;Acc:O80470]
AT1G78780	-2.04821		pathogenesis-related family protein [Source:TAIR;Acc:AT1G78780]
AT5G07390	-2.04913	RBOHA	Respiratory burst oxidase homolog protein A [Source:UniProtKB/Swiss-Prot;Acc:O81209]
AT2G15300	-2.05102		Leucine-rich repeat protein kinase family protein [Source:TAIR;Acc:AT2G15300]
AT1G28480	-2.05222	GRXC9	Glutaredoxin-C9 [Source:UniProtKB/Swiss-Prot;Acc:Q9SGP6]
AT1G51820	-2.05222		Probable LRR receptor-like serine/threonine-protein kinase At1g51820 [Source:UniProtKB/Swiss-Prot;Acc:C0LGG3]
AT1G57570	-2.05222	JAL14	Jacalin-related lectin 14 [Source:UniProtKB/Swiss-Prot;Acc:F4I837]
AT3G45330	-2.05222	LECRK11	Putative L-type lectin-domain containing receptor kinase I.1 [Source:UniProtKB/Swiss-Prot;Acc:Q9M3E5]
AT4G03490	-2.05222		Ankyrin repeat family protein [Source:TAIR;Acc:AT4G03490]
AT5G09290	-2.05222	SAL4	Probable SAL4 phosphatase [Source:UniProtKB/Swiss-Prot;Acc:Q84VY5]
AT5G19800	-2.05222		hydroxyproline-rich glycoprotein family protein [Source:TAIR;Acc:AT5G19800]
AT1G22230	-2.05234		unknown protein; LOCATED IN: chloroplast; BEST Arabidopsis thaliana protein match is: unknown protein (TAIR:AT1G78110.1); Has 2358 Blast hits to 1759 proteins in 159 species: Archae - 2; Bacteria - 36; Metazoa - 1046; Fungi - 203; Plants - 157; Viru /.../72; Other Eukaryotes - 842 (source: NCBI BLink). [Source:TAIR;Acc:AT1G22230]
AT5G51440	-2.05349	HSP23.5	23.5 kDa heat shock protein, mitochondrial [Source:UniProtKB/Swiss-Prot;Acc:Q9FGM9]
AT3G24460	-2.05361		Serinc-domain containing serine and sphingolipid biosynthesis protein [Source:TAIR;Acc:AT3G24460]
AT2G43570	-2.05406	CHI	chitinase, putative [Source:TAIR;Acc:AT2G43570]
AT2G41660	-2.05503	MIZ1	Protein MIZU-KUSSEI 1 [Source:UniProtKB/Swiss-Prot;Acc:O22227]
AT4G22070	-2.05539	WRKY31	Probable WRKY transcription factor 31 [Source:UniProtKB/Swiss-Prot;Acc:Q93WT0]
AT4G16146	-2.05611		cAMP-regulated phosphoprotein 19-related protein [Source:TAIR;Acc:AT4G16146]
AT4G15480	-2.05874	UGT84A1	UDP-glycosyltransferase 84A1 [Source:UniProtKB/Swiss-Prot;Acc:Q5XF20]
AT3G59700	-2.05911	LECRK55	L-type lectin-domain containing receptor kinase V.5 [Source:UniProtKB/Swiss-Prot;Acc:Q96285]
AT5G44910	-2.05911		Toll-Interleukin-Resistance (TIR) domain family protein [Source:TAIR;Acc:AT5G44910]
AT1G08630	-2.05958	THA1	Probable low-specificity L-threonine aldolase 1 [Source:UniProtKB/Swiss-Prot;Acc:Q8RXU4]
AT5G10280	-2.06226	MYB92	myb domain protein 92 [Source:TAIR;Acc:AT5G10280]
AT5G05490	-2.06275	SYN1	Sister chromatid cohesion 1 protein 1 [Source:UniProtKB/Swiss-Prot;Acc:Q9S7T7]
AT5G06300	-2.06322	LOG7	Cytokinin riboside 5'-monophosphate phosphoribohydrolase LOG7 [Source:UniProtKB/Swiss-Prot;Acc:Q8GW29]
AT1G13510	-2.06423		Protein of unknown function (DUF1262) [Source:TAIR;Acc:AT1G13510]
AT2G14510	-2.06638		Leucine-rich repeat receptor-like serine/threonine-protein kinase At2g14510 [Source:UniProtKB/Swiss-Prot;Acc:Q9ZQR3]
AT3G47480	-2.06649	CML47	Probable calcium-binding protein CML47 [Source:UniProtKB/Swiss-Prot;Acc:Q9SN89]
AT5G26920	-2.06956	CBP60G	Calmodulin-binding protein 60 G [Source:UniProtKB/Swiss-Prot;Acc:F4K2R6]
AT2G29620	-2.06963		unknown protein; BEST Arabidopsis thaliana protein match is: unknown protein (TAIR:AT1G07330.1); Has 887 Blast hits to 750 proteins in 151 species: Archae - 2; Bacteria - 63; Metazoa - 270; Fungi - 51; Plants - 111; Viruses - 6; Other Eukaryotes - 3 /.../urce: NCBI BLink). [Source:TAIR;Acc:AT2G29620]
AT1G02220	-2.07179	NAC003	NAC domain-containing protein 3 [Source:UniProtKB/Swiss-Prot;Acc:Q5PP28]
AT1G49405	-2.07237		CASP-like protein 5C3 [Source:UniProtKB/Swiss-Prot;Acc:Q3ECT8]
AT3G47790	-2.07382	ABCA8	ABC transporter A family member 8 [Source:UniProtKB/Swiss-Prot;Acc:Q8LPK0]
AT5G48410	-2.07425	GLR1.3	Glutamate receptor 1.3 [Source:UniProtKB/Swiss-Prot;Acc:Q9FH75]
AT1G17300	-2.07425		unknown protein; BEST Arabidopsis thaliana protein match is: unknown protein (TAIR:AT1G17285.1); Has 27 Blast hits to 27 proteins in 4 species: Archae - 0; Bacteria - 0; Metazoa - 0; Fungi - 0; Plants - 27; Viruses - 0; Other Eukaryotes - 0 (source: /.../BLink). [Source:TAIR;Acc:AT1G17300]
AT1G02920	-2.07517	GSTF7	Glutathione S-transferase F7 [Source:UniProtKB/Swiss-Prot;Acc:Q9SRY5]
AT1G07430	-2.07535	AIP1	Protein phosphatase 2C 3 [Source:UniProtKB/Swiss-Prot;Acc:Q9LNW3]
AT5G09930	-2.07668	ABCF2	ABC transporter F family member 2 [Source:UniProtKB/Swiss-Prot;Acc:Q9FIB4]
AT4G30420	-2.07857		WAT1-related protein At4g30420 [Source:UniProtKB/Swiss-Prot;Acc:Q9M0B8]
AT3G60140	-2.0797	BGLU30	Beta-glucosidase 30 [Source:UniProtKB/Swiss-Prot;Acc:Q9M1C9]
AT2G41260	-2.08114	M17	glycine-rich protein / late embryogenesis abundant protein (M17) [Source:TAIR;Acc:AT2G41260]
AT4G32780	-2.08114		phosphoinositide binding [Source:TAIR;Acc:AT4G32780]
AT5G57220	-2.08344	CYP81F2	cytochrome P450, family 81, subfamily F, polypeptide 2 [Source:TAIR;Acc:AT5G57220]
AT1G16150	-2.08359	WAKL4	wall associated kinase-like 4 [Source:TAIR;Acc:AT1G16150]
AT4G40020	-2.08359		Myosin heavy chain-related protein [Source:TAIR;Acc:AT4G40020]
AT2G01880	-2.08428	PAP7	Purple acid phosphatase 7 [Source:UniProtKB/Swiss-Prot;Acc:Q8S341]
AT3G11430	-2.08599	GPAT5	Glycerol-3-phosphate acyltransferase 5 [Source:UniProtKB/Swiss-Prot;Acc:Q9CAY3]
AT3G23510	-2.08622		Cyclopropane-fatty-acyl-phospholipid synthase [Source:TAIR;Acc:AT3G23510]
AT3G47640	-2.08716	BHLH47	Transcription factor bHLH47 [Source:UniProtKB/Swiss-Prot;Acc:Q9SN74]
AT2G42360	-2.08737	ATL41	E3 ubiquitin-protein ligase ATL41 [Source:UniProtKB/Swiss-Prot;Acc:Q9SLC3]
AT5G16770	-2.08737	AtMYB9	myb domain protein 9 [Source:TAIR;Acc:AT5G16770]
AT2G24800	-2.08875	PER18	Peroxidase 18 [Source:UniProtKB/Swiss-Prot;Acc:Q9SK52]
AT3G12720	-2.09094	ATY53	myb domain protein 67 [Source:TAIR;Acc:AT3G12720]
AT5G59490	-2.09202		Haloacid dehalogenase-like hydrolase (HAD) superfamily protein [Source:TAIR;Acc:AT5G59490]
AT1G05680	-2.09505	UGT74E2	UDP-glycosyltransferase 74E2 [Source:UniProtKB/Swiss-Prot;Acc:Q9SYK9]
AT1G65510	-2.09564		unknown protein; FUNCTIONS IN: molecular_function unknown; INVOLVED IN: N-terminal protein myristoylation; LOCATED IN: endomembrane system; EXPRESSED IN: 9 plant structures; EXPRESSED DURING: LP.06 six leaves visible, LP.04 four leaves visible, 4 an /.../, petal differentiation and expansion stage, LP.08 eight leaves visible; BEST Arabidopsis thaliana protein match is: unknown protein (TAIR:AT1G6…
AT2G29460	-2.09564	GSTU4	Glutathione S-transferase U4 [Source:UniProtKB/Swiss-Prot;Acc:Q9ZW27]
AT4G16270	-2.09564	PER40	Peroxidase superfamily protein [Source:TAIR;Acc:AT4G16270]
AT5G17350	-2.09564		unknown protein; FUNCTIONS IN: molecular_function unknown; INVOLVED IN: N-terminal protein myristoylation; LOCATED IN: cellular_component unknown; EXPRESSED IN: 15 plant structures; EXPRESSED DURING: 8 growth stages; BEST Arabidopsis thaliana protei /.../h is: unknown protein (TAIR:AT3G03280.1); Has 1807 Blast hits to 1807 proteins in 277 species: Archae - 0; Bacteria - 0; Metazoa - 736; Fungi - …
AT1G53270	-2.0961	ABCG10	ABC transporter G family member 10 [Source:UniProtKB/Swiss-Prot;Acc:Q9MAH4]
AT1G24580	-2.09721		RING/U-box superfamily protein [Source:TAIR;Acc:AT1G24580]
AT2G26480	-2.09902	UGT76D1	UDP-glycosyltransferase 76D1 [Source:UniProtKB/Swiss-Prot;Acc:O48715]
AT1G78990	-2.09948		HXXXD-type acyl-transferase family protein [Source:TAIR;Acc:AT1G78990]
AT5G19040	-2.10072	IPT5	Adenylate isopentenyltransferase 5, chloroplastic [Source:UniProtKB/Swiss-Prot;Acc:Q94ID2]
AT1G30990	-2.10667		Polyketide cyclase/dehydrase and lipid transport superfamily protein [Source:TAIR;Acc:AT1G30990]
AT1G35330	-2.10667	ATL34	RING-H2 finger protein ATL34 [Source:UniProtKB/Swiss-Prot;Acc:Q9C7I1]
AT1G52343	-2.10667		unknown protein; BEST Arabidopsis thaliana protein match is: unknown protein (TAIR:AT4G32680.1); Has 30201 Blast hits to 17322 proteins in 780 species: Archae - 12; Bacteria - 1396; Metazoa - 17338; Fungi - 3422; Plants - 5037; Viruses - 0; Other Eu /.../es - 2996 (source: NCBI BLink). [Source:TAIR;Acc:AT1G52343]
AT2G22290	-2.10667	RABH1D	Ras-related protein RABH1d [Source:UniProtKB/Swiss-Prot;Acc:Q9SID8]
AT2G37430	-2.10667	ZAT11	Zinc finger protein ZAT11 [Source:UniProtKB/Swiss-Prot;Acc:Q9SLD4]
AT3G16300	-2.10667		CASP-like protein 3A1 [Source:UniProtKB/Swiss-Prot;Acc:Q3EB59]
AT3G23630	-2.10667	IPT7	Adenylate isopentenyltransferase 7, mitochondrial [Source:UniProtKB/Swiss-Prot;Acc:Q94ID1]
AT4G18350	-2.10667	NCED2	9-cis-epoxycarotenoid dioxygenase NCED2, chloroplastic [Source:UniProtKB/Swiss-Prot;Acc:O49505]
AT5G38790	-2.10667		unknown protein; BEST Arabidopsis thaliana protein match is: unknown protein (TAIR:AT3G30580.1); Has 1807 Blast hits to 1807 proteins in 277 species: Archae - 0; Bacteria - 0; Metazoa - 736; Fungi - 347; Plants - 385; Viruses - 0; Other Eukaryotes - /.../source: NCBI BLink). [Source:TAIR;Acc:AT5G38790]
AT5G40010	-2.10667	AATP1	AAA-ATPase 1 [Source:TAIR;Acc:AT5G40010]
AT2G45130	-2.11895	SPX3	SPX domain-containing protein 3 [Source:UniProtKB/Swiss-Prot;Acc:Q5PP62]
AT4G07820	-2.12789		CAP (Cysteine-rich secretory proteins, Antigen 5, and Pathogenesis-related 1 protein) superfamily protein [Source:TAIR;Acc:AT4G07820]
AT1G02390	-2.12939	GPAT2	Probable glycerol-3-phosphate acyltransferase 2 [Source:UniProtKB/Swiss-Prot;Acc:Q9FZ22]
AT4G03540	-2.12939		CASP-like protein 1C1 [Source:UniProtKB/Swiss-Prot;Acc:Q9ZT81]
AT4G25250	-2.12939		Plant invertase/pectin methylesterase inhibitor superfamily protein [Source:TAIR;Acc:AT4G25250]
AT4G14370	-2.13469		Disease resistance protein (TIR-NBS-LRR class) family [Source:TAIR;Acc:AT4G14370]
AT5G45810	-2.13838	CIPK19	CBL-interacting serine/threonine-protein kinase 19 [Source:UniProtKB/Swiss-Prot;Acc:Q9FJ55]
AT3G06390	-2.14111		CASP-like protein 1D2 [Source:UniProtKB/Swiss-Prot;Acc:Q9SQU2]
AT5G62480	-2.14144	GSTU9	Glutathione S-transferase U9 [Source:UniProtKB/Swiss-Prot;Acc:Q9FUT0]
AT2G39410	-2.1462		alpha/beta-Hydrolases superfamily protein [Source:TAIR;Acc:AT2G39410]
AT3G44326	-2.14974		F-box protein At3g44326 [Source:UniProtKB/Swiss-Prot;Acc:Q2V3R1]
AT5G40780	-2.15248	LHT1	Lysine histidine transporter 1 [Source:UniProtKB/Swiss-Prot;Acc:Q9FKS8]
AT2G18050	-2.15539	HIS1-3	histone H1-3 [Source:TAIR;Acc:AT2G18050]
AT3G56260	-2.15914		unknown protein; Has 20 Blast hits to 19 proteins in 11 species: Archae - 0; Bacteria - 0; Metazoa - 4; Fungi - 2; Plants - 10; Viruses - 0; Other Eukaryotes - 4 (source: NCBI BLink). [Source:TAIR;Acc:AT3G56260]
AT5G23840	-2.15914		MD-2-related lipid recognition domain-containing protein [Source:TAIR;Acc:AT5G23840]
AT1G74770	-2.16201		zinc ion binding [Source:TAIR;Acc:AT1G74770]
AT4G23700	-2.17319	CHX17	Cation/H(+) antiporter 17 [Source:UniProtKB/Swiss-Prot;Acc:Q9SUQ7]
AT5G53450	-2.17375	PAP14	Probable plastid-lipid-associated protein 14, chloroplastic [Source:UniProtKB/Swiss-Prot;Acc:Q9LV04]
AT1G78340	-2.17632	GSTU22	Glutathione S-transferase U22 [Source:UniProtKB/Swiss-Prot;Acc:Q8GYM1]
AT3G03650	-2.18467	EDA5	Exostosin family protein [Source:TAIR;Acc:AT3G03650]
AT3G12240	-2.18467	SCPL15	Serine carboxypeptidase-like 15 [Source:UniProtKB/Swiss-Prot;Acc:Q9C7D2]
AT1G30730	-2.18973		FAD-binding Berberine family protein [Source:TAIR;Acc:AT1G30730]
AT5G49340	-2.19075	TBL4	Protein trichome birefringence-like 4 [Source:UniProtKB/Swiss-Prot;Acc:Q9FJ06]
AT1G15460	-2.19309	BOR4	Boron transporter 4 [Source:UniProtKB/Swiss-Prot;Acc:Q9XI23]
AT1G68450	-2.19309	VQ8	VQ motif-containing protein 8, chloroplastic [Source:UniProtKB/Swiss-Prot;Acc:Q9CA36]
AT4G15417	-2.19978	ATRTL1	RNAse II-like 1 [Source:TAIR;Acc:AT4G15417]
AT5G43370	-2.21137	PHT1-2	Probable inorganic phosphate transporter 1-2 [Source:UniProtKB/Swiss-Prot;Acc:Q96243]
AT2G29350	-2.2322	SAG13	Senescence-associated protein 13 [Source:UniProtKB/Swiss-Prot;Acc:Q9ZW18]
AT5G51160	-2.2322		Ankyrin repeat family protein [Source:TAIR;Acc:AT5G51160]
AT2G44010	-2.24255		unknown protein; BEST Arabidopsis thaliana protein match is: unknown protein (TAIR:AT3G59880.1); Has 18 Blast hits to 18 proteins in 7 species: Archae - 0; Bacteria - 0; Metazoa - 0; Fungi - 0; Plants - 18; Viruses - 0; Other Eukaryotes - 0 (source: /.../BLink). [Source:TAIR;Acc:AT2G44010]
AT1G27730	-2.24607	ZAT10	Zinc finger protein ZAT10 [Source:UniProtKB/Swiss-Prot;Acc:Q96289]
AT5G61600	-2.24833	ERF104	Ethylene-responsive transcription factor ERF104 [Source:UniProtKB/Swiss-Prot;Acc:Q9FKG1]
AT1G52340	-2.25317	ABA2	Xanthoxin dehydrogenase [Source:UniProtKB/Swiss-Prot;Acc:Q9C826]
AT1G03050	-2.25867		Putative clathrin assembly protein At1g03050 [Source:UniProtKB/Swiss-Prot;Acc:Q9SA65]
AT1G03790	-2.25867	SOM	Zinc finger CCCH domain-containing protein 2 [Source:UniProtKB/Swiss-Prot;Acc:Q9ZWA1]
AT1G51640	-2.25867	ATEXO70G2	exocyst subunit exo70 family protein G2 [Source:TAIR;Acc:AT1G51640]
AT1G56240	-2.25867	PP2B13	F-box protein PP2-B13 [Source:UniProtKB/Swiss-Prot;Acc:Q9C7J9]
AT1G77880	-2.25867		Putative F-box protein At1g77880 [Source:UniProtKB/Swiss-Prot;Acc:Q9SH13]
AT2G20030	-2.25867	ATL12	Putative RING-H2 finger protein ATL12 [Source:UniProtKB/Swiss-Prot;Acc:Q9SL78]
AT2G29430	-2.25867		Family of unknown function (DUF572) [Source:TAIR;Acc:AT2G29430]
AT2G31081	-2.25867	CLE4	CLAVATA3/ESR (CLE)-related protein 4 [Source:UniProtKB/Swiss-Prot;Acc:Q8S8N0]
AT2G35980	-2.25867	YLS9	Protein YLS9 [Source:UniProtKB/Swiss-Prot;Acc:Q9SJ52]
AT2G40170	-2.25867	EM6	Em-like protein GEA6 [Source:UniProtKB/Swiss-Prot;Acc:Q02973]
AT2G42395	-2.25867		unknown protein; Has 35333 Blast hits to 34131 proteins in 2444 species: Archae - 798; Bacteria - 22429; Metazoa - 974; Fungi - 991; Plants - 531; Viruses - 0; Other Eukaryotes - 9610 (source: NCBI BLink). [Source:TAIR;Acc:AT2G42395]
AT3G02940	-2.25867	MYB107	myb domain protein 107 [Source:TAIR;Acc:AT3G02940]
AT3G18250	-2.25867		Putative membrane lipoprotein [Source:TAIR;Acc:AT3G18250]
AT3G19020	-2.25867	PEX1	Pollen-specific leucine-rich repeat extensin-like protein 1 [Source:UniProtKB/Swiss-Prot;Acc:Q9LJ64]
AT3G23240	-2.25867	ERF1B	Ethylene-responsive transcription factor 1B [Source:UniProtKB/Swiss-Prot;Acc:Q8LDC8]
AT3G27250	-2.25867		unknown protein; BEST Arabidopsis thaliana protein match is: unknown protein (TAIR:AT5G40800.1); Has 104 Blast hits to 104 proteins in 13 species: Archae - 0; Bacteria - 0; Metazoa - 0; Fungi - 0; Plants - 104; Viruses - 0; Other Eukaryotes - 0 (sou /.../CBI BLink). [Source:TAIR;Acc:AT3G27250]
AT3G27440	-2.25867	UKL5	Uridine kinase-like protein 5 [Source:UniProtKB/Swiss-Prot;Acc:Q9LTY6]
AT5G01380	-2.25867	GT-3A	Trihelix transcription factor GT-3a [Source:UniProtKB/Swiss-Prot;Acc:Q9SDW0]
AT5G26170	-2.25867	WRKY50	Probable WRKY transcription factor 50 [Source:UniProtKB/Swiss-Prot;Acc:Q8VWQ5]
AT5G28460	-2.25867		Pentatricopeptide repeat-containing protein At5g28460 [Source:UniProtKB/Swiss-Prot;Acc:Q9LKU8]
AT5G37800	-2.25867	BHLH86	Putative transcription factor bHLH086 [Source:UniProtKB/Swiss-Prot;Acc:Q9FJ00]
AT5G45105	-2.25867	ZIP8	zinc transporter 8 precursor [Source:TAIR;Acc:AT5G45105]
AT5G49620	-2.25867	MYB78	myb domain protein 78 [Source:TAIR;Acc:AT5G49620]
AT5G54165	-2.25867		unknown protein; FUNCTIONS IN: molecular_function unknown; INVOLVED IN: biological_process unknown; LOCATED IN: cellular_component unknown; Has 30201 Blast hits to 17322 proteins in 780 species: Archae - 12; Bacteria - 1396; Metazoa - 17338; Fungi - /.../ Plants - 5037; Viruses - 0; Other Eukaryotes - 2996 (source: NCBI BLink). [Source:TAIR;Acc:AT5G54165]
AT5G59590	-2.25867	UGT76E2	UDP-glycosyltransferase 76E2 [Source:UniProtKB/Swiss-Prot;Acc:Q9LTH2]
AT4G30460	-2.26217		glycine-rich protein [Source:TAIR;Acc:AT4G30460]
AT5G13900	-2.27914	VAS	Lipid transfer-like protein VAS [Source:UniProtKB/Swiss-Prot;Acc:Q9FFY3]
AT4G01630	-2.28724	EXPA17	Putative expansin-A17 [Source:UniProtKB/Swiss-Prot;Acc:Q9ZSI1]
AT5G25250	-2.29038	FLOT1	Flotillin-like protein 1 [Source:UniProtKB/Swiss-Prot;Acc:Q501E6]
AT5G23190	-2.2943	CYP86B1	Cytochrome P450 86B1 [Source:UniProtKB/Swiss-Prot;Acc:Q9FMY1]
AT5G59220	-2.2943	HAI1	Probable protein phosphatase 2C 78 [Source:UniProtKB/Swiss-Prot;Acc:Q9FIF5]
AT5G60280	-2.29664	LECRK18	L-type lectin-domain containing receptor kinase I.8 [Source:UniProtKB/Swiss-Prot;Acc:Q9LSR9]
AT1G54890	-2.29932		Late embryogenesis abundant (LEA) protein-related [Source:TAIR;Acc:AT1G54890]
AT2G43510	-2.31162	ATTI1	Defensin-like protein 195 [Source:UniProtKB/Swiss-Prot;Acc:Q42328]
AT4G31870	-2.31298	GPX7	Putative glutathione peroxidase 7, chloroplastic [Source:UniProtKB/Swiss-Prot;Acc:Q9SZ54]
AT4G37700	-2.31526		unknown protein; Has 64 Blast hits to 64 proteins in 11 species: Archae - 0; Bacteria - 0; Metazoa - 0; Fungi - 0; Plants - 64; Viruses - 0; Other Eukaryotes - 0 (source: NCBI BLink). [Source:TAIR;Acc:AT4G37700]
AT5G44460	-2.31526	CML43	Probable calcium-binding protein CML43 [Source:UniProtKB/Swiss-Prot;Acc:Q9FI19]
AT1G61750	-2.39618	CRRSP1	Cysteine-rich repeat secretory protein 1 [Source:UniProtKB/Swiss-Prot;Acc:Q9SYB1]
AT2G14610	-2.39618	PR1	Pathogenesis-related protein 1 [Source:UniProtKB/Swiss-Prot;Acc:P33154]
AT2G41810	-2.39618		Protein of unknown function, DUF642 [Source:TAIR;Acc:AT2G41810]
AT3G17520	-2.39618		Late embryogenesis abundant protein (LEA) family protein [Source:TAIR;Acc:AT3G17520]
AT3G60270	-2.39618		Cupredoxin superfamily protein [Source:TAIR;Acc:AT3G60270]
AT4G37990	-2.39618	CAD8	Cinnamyl alcohol dehydrogenase 8 [Source:UniProtKB/Swiss-Prot;Acc:Q02972]
AT5G18560	-2.39618	ERF086	Ethylene-responsive transcription factor ERF086 [Source:UniProtKB/Swiss-Prot;Acc:Q6J9Q2]
AT5G40320	-2.39618		Cysteine/Histidine-rich C1 domain family protein [Source:TAIR;Acc:AT5G40320]
AT4G05100	-2.40387	AtMYB74	myb domain protein 74 [Source:TAIR;Acc:AT4G05100]
AT5G62165	-2.40707	AGL42	AGAMOUS-like 42 [Source:TAIR;Acc:AT5G62165]
AT1G49960	-2.40805	NAT4	Nucleobase-ascorbate transporter 4 [Source:UniProtKB/Swiss-Prot;Acc:P93039]
AT1G26410	-2.41248		FAD-binding Berberine family protein [Source:TAIR;Acc:AT1G26410]
AT1G34420	-2.41479		leucine-rich repeat transmembrane protein kinase family protein [Source:TAIR;Acc:AT1G34420]
AT1G69260	-2.41748	AFP1	Ninja-family protein AFP1 [Source:UniProtKB/Swiss-Prot;Acc:Q9LQ98]
AT1G69480	-2.41778	PHO1-H10	Phosphate transporter PHO1 homolog 10 [Source:UniProtKB/Swiss-Prot;Acc:Q6R8G0]
AT5G61650	-2.42217	CYCU4-3	Cyclin-U4-3 [Source:UniProtKB/Swiss-Prot;Acc:Q9FKF6]
AT1G05660	-2.42503		Pectin lyase-like superfamily protein [Source:TAIR;Acc:AT1G05660]
AT4G26200	-2.42613	ACS7	1-aminocyclopropane-1-carboxylate synthase 7 [Source:UniProtKB/Swiss-Prot;Acc:Q9STR4]
AT1G53130	-2.43925	GRI	Protein GRIM REAPER [Source:UniProtKB/Swiss-Prot;Acc:Q9LNN7]
AT1G74080	-2.43925	MYB122	Transcription factor MYB122 [Source:UniProtKB/Swiss-Prot;Acc:Q9C9C8]
AT5G65600	-2.43925	LECRK92	L-type lectin-domain containing receptor kinase IX.2 [Source:UniProtKB/Swiss-Prot;Acc:Q9LSL5]
AT4G23450	-2.46031	AIRP1	RING/U-box superfamily protein [Source:TAIR;Acc:AT4G23450]
AT4G23493	-2.46031		unknown protein; Has 30201 Blast hits to 17322 proteins in 780 species: Archae - 12; Bacteria - 1396; Metazoa - 17338; Fungi - 3422; Plants - 5037; Viruses - 0; Other Eukaryotes - 2996 (source: NCBI BLink). [Source:TAIR;Acc:AT4G23493]
AT5G59510	-2.46031	RTFL5	ROTUNDIFOLIA like 5 [Source:TAIR;Acc:AT5G59510]
AT5G63350	-2.46031		unknown protein; BEST Arabidopsis thaliana protein match is: unknown protein (TAIR:AT3G48510.1); Has 103 Blast hits to 102 proteins in 13 species: Archae - 0; Bacteria - 0; Metazoa - 2; Fungi - 0; Plants - 101; Viruses - 0; Other Eukaryotes - 0 (sou /.../CBI BLink). [Source:TAIR;Acc:AT5G63350]
AT1G34670	-2.47018	AtMYB93	myb domain protein 93 [Source:TAIR;Acc:AT1G34670]
AT1G72125	-2.4728	NPF5.13	Protein NRT1/ PTR FAMILY 5.13 [Source:UniProtKB/Swiss-Prot;Acc:Q0WSZ6]
AT3G02850	-2.49396	SKOR	Potassium channel SKOR [Source:UniProtKB/Swiss-Prot;Acc:Q9M8S6]
AT1G67920	-2.49474		unknown protein; BEST Arabidopsis thaliana protein match is: unknown protein (TAIR:AT1G24600.1); Has 22 Blast hits to 22 proteins in 5 species: Archae - 0; Bacteria - 0; Metazoa - 0; Fungi - 0; Plants - 22; Viruses - 0; Other Eukaryotes - 0 (source: /.../BLink). [Source:TAIR;Acc:AT1G67920]
AT2G22630	-2.49474	AGL17	Agamous-like MADS-box protein AGL17 [Source:UniProtKB/Swiss-Prot;Acc:Q38840]
AT3G46700	-2.4984	UGT76E3	UDP-glycosyltransferase 76E3 [Source:UniProtKB/Swiss-Prot;Acc:Q494Q1]
AT5G59820	-2.51206	ZAT12	Zinc finger protein ZAT12 [Source:UniProtKB/Swiss-Prot;Acc:Q42410]
AT4G20390	-2.51623		CASP-like protein 1B2 [Source:UniProtKB/Swiss-Prot;Acc:Q9SUP0]
AT3G29575	-2.51722	AFP3	Ninja-family protein AFP3 [Source:UniProtKB/Swiss-Prot;Acc:Q94F39]
AT1G20860	-2.52171	PHT1-8	Probable inorganic phosphate transporter 1-8 [Source:UniProtKB/Swiss-Prot;Acc:Q9SYQ1]
AT1G67020	-2.52171		unknown protein; FUNCTIONS IN: molecular_function unknown; INVOLVED IN: biological_process unknown; LOCATED IN: cellular_component unknown; EXPRESSED IN: leaf; Has 72 Blast hits to 72 proteins in 9 species: Archae - 0; Bacteria - 0; Metazoa - 0; Fun /.../; Plants - 72; Viruses - 0; Other Eukaryotes - 0 (source: NCBI BLink). [Source:TAIR;Acc:AT1G67020]
AT1G78390	-2.52171	NCED9	9-cis-epoxycarotenoid dioxygenase NCED9, chloroplastic [Source:UniProtKB/Swiss-Prot;Acc:Q9M9F5]
AT2G01530	-2.52171	MLP329	MLP-like protein 329 [Source:UniProtKB/Swiss-Prot;Acc:Q9ZVF2]
AT2G19050	-2.52171		GDSL esterase/lipase At2g19050 [Source:UniProtKB/Swiss-Prot;Acc:O64468]
AT2G31082	-2.52171	CLE7	CLAVATA3/ESR (CLE)-related protein 7 [Source:UniProtKB/Swiss-Prot;Acc:Q8S8N1]
AT3G50980	-2.52171	XERO1	Dehydrin Xero 1 [Source:UniProtKB/Swiss-Prot;Acc:P25863]
AT3G55515	-2.52171	DVL8	ROTUNDIFOLIA like 7 [Source:TAIR;Acc:AT3G55515]
AT5G03550	-2.52171		BEST Arabidopsis thaliana protein match is: TRAF-like family protein (TAIR:AT2G42460.1); Has 137 Blast hits to 125 proteins in 2 species: Archae - 0; Bacteria - 0; Metazoa - 0; Fungi - 0; Plants - 137; Viruses - 0; Other Eukaryotes - 0 (source: NCBI /.../). [Source:TAIR;Acc:AT5G03550]
AT5G21030	-2.52171	AGO8	Protein argonaute 8 [Source:UniProtKB/Swiss-Prot;Acc:Q3E984]
AT1G49570	-2.52756	PER10	Peroxidase 10 [Source:UniProtKB/Swiss-Prot;Acc:Q9FX85]
AT1G56650	-2.52876	MYB75	Transcription factor MYB75 [Source:UniProtKB/Swiss-Prot;Acc:Q9FE25]
AT5G23350	-2.53274		GRAM domain-containing protein / ABA-responsive protein-related [Source:TAIR;Acc:AT5G23350]
AT5G09530	-2.53445		hydroxyproline-rich glycoprotein family protein [Source:TAIR;Acc:AT5G09530]
AT1G10480	-2.53578	ZFP5	Zinc finger protein 5 [Source:UniProtKB/Swiss-Prot;Acc:Q39264]
AT5G09520	-2.53878		hydroxyproline-rich glycoprotein family protein [Source:TAIR;Acc:AT5G09520]
AT1G36622	-2.54555		unknown protein; LOCATED IN: endomembrane system; BEST Arabidopsis thaliana protein match is: unknown protein (TAIR:AT1G36640.1); Has 12 Blast hits to 12 proteins in 2 species: Archae - 0; Bacteria - 0; Metazoa - 0; Fungi - 0; Plants - 12; Viruses - /.../her Eukaryotes - 0 (source: NCBI BLink). [Source:TAIR;Acc:AT1G36622]
AT3G49760	-2.56477	AtbZIP5	basic leucine-zipper 5 [Source:TAIR;Acc:AT3G49760]
AT5G43580	-2.57154		Serine protease inhibitor, potato inhibitor I-type family protein [Source:TAIR;Acc:AT5G43580]
AT1G73260	-2.57422	ATKTI1	kunitz trypsin inhibitor 1 [Source:TAIR;Acc:AT1G73260]
AT5G14470	-2.5806	GLCAK2	Probable glucuronokinase 2 [Source:UniProtKB/Swiss-Prot;Acc:Q9LY82]
AT5G43290	-2.58584	WRKY49	Probable WRKY transcription factor 49 [Source:UniProtKB/Swiss-Prot;Acc:Q9FHR7]
AT4G13620	-2.587	ERF062	Ethylene-responsive transcription factor ERF062 [Source:UniProtKB/Swiss-Prot;Acc:Q9SVQ0]
AT1G03990	-2.58882	FAO1	Long-chain-alcohol oxidase FAO1 [Source:UniProtKB/Swiss-Prot;Acc:Q9ZWB9]
AT3G55150	-2.59075	ATEXO70H1	exocyst subunit exo70 family protein H1 [Source:TAIR;Acc:AT3G55150]
AT2G27389	-2.5926		unknown protein; LOCATED IN: endomembrane system. [Source:TAIR;Acc:AT2G27389]
AT4G12270	-2.5936		Copper amine oxidase family protein [Source:TAIR;Acc:AT4G12270]
AT5G64905	-2.59945	PEP3	Elicitor peptide 3 [Source:UniProtKB/Swiss-Prot;Acc:Q8LAX3]
AT4G14630	-2.60451	GLP9	Germin-like protein subfamily 1 member 8 [Source:UniProtKB/Swiss-Prot;Acc:Q9LEA7]
AT5G19890	-2.6046	PER59	Peroxidase 59 [Source:UniProtKB/Swiss-Prot;Acc:Q39034]
AT1G61800	-2.60768	GPT2	Glucose-6-phosphate/phosphate translocator 2, chloroplastic [Source:UniProtKB/Swiss-Prot;Acc:Q94B38]
AT1G64000	-2.61482	WRKY56	Probable WRKY transcription factor 56 [Source:UniProtKB/Swiss-Prot;Acc:Q8VWQ4]
AT4G13800	-2.61482		Probable magnesium transporter NIPA2 [Source:UniProtKB/Swiss-Prot;Acc:B3LFA3]
AT3G53150	-2.61857	UGT73D1	UDP-glycosyltransferase 73D1 [Source:UniProtKB/Swiss-Prot;Acc:Q9SCP6]
AT5G24780	-2.61982	VSP1	Vegetative storage protein 1 [Source:UniProtKB/Swiss-Prot;Acc:O49195]
AT1G80340	-2.6248	GA3OX2	Gibberellin 3-beta-dioxygenase 2 [Source:UniProtKB/Swiss-Prot;Acc:Q9ZT84]
AT3G21380	-2.63719	JAL36	Jacalin-related lectin 36 [Source:UniProtKB/Swiss-Prot;Acc:Q9LIF8]
AT5G05900	-2.63719	UGT76C3	UDP-glycosyltransferase 76C3 [Source:UniProtKB/Swiss-Prot;Acc:Q9FI96]
AT1G33030	-2.65921		O-methyltransferase family protein [Source:TAIR;Acc:AT1G33030]
AT5G11210	-2.66467	ATGLR2.5	glutamate receptor 2.5 [Source:TAIR;Acc:AT5G11210]
AT5G15500	-2.67371		Ankyrin repeat family protein [Source:TAIR;Acc:AT5G15500]
AT5G41570	-2.67371	WRKY24	Probable WRKY transcription factor 24 [Source:UniProtKB/Swiss-Prot;Acc:Q9FFS3]
AT2G42540	-2.68398	COR15A	Protein COLD-REGULATED 15A, chloroplastic [Source:UniProtKB/Swiss-Prot;Acc:Q42512]
AT1G67856	-2.69165		RING/U-box superfamily protein [Source:TAIR;Acc:AT1G67856]
AT4G14690	-2.6996	ELIP2	Early light-induced protein 2, chloroplastic [Source:UniProtKB/Swiss-Prot;Acc:Q94K66]
AT2G41280	-2.70228	M10	late embryogenesis abundant protein (M10) / LEA protein M10 [Source:TAIR;Acc:AT2G41280]
AT1G65970	-2.70374	PRXIIC	Peroxiredoxin-2C [Source:UniProtKB/Swiss-Prot;Acc:Q9SRZ4]
AT4G34550	-2.70934		BEST Arabidopsis thaliana protein match is: F-box family protein (TAIR:AT2G16365.3); Has 37 Blast hits to 37 proteins in 8 species: Archae - 0; Bacteria - 0; Metazoa - 0; Fungi - 0; Plants - 37; Viruses - 0; Other Eukaryotes - 0 (source: NCBI BLink). [Source:TAIR;Acc:AT4G34550]
AT1G21550	-2.71435	CML44	Probable calcium-binding protein CML44 [Source:UniProtKB/Swiss-Prot;Acc:Q9LPK5]
AT1G09950	-2.72544	RAS1	RESPONSE TO ABA AND SALT 1 [Source:TAIR;Acc:AT1G09950]
AT4G31970	-2.73698	CYP82C2	Cytochrome P450 82C2 [Source:UniProtKB/Swiss-Prot;Acc:O49394]
AT1G47395	-2.763		unknown protein; FUNCTIONS IN: molecular_function unknown; INVOLVED IN: biological_process unknown; LOCATED IN: endomembrane system; BEST Arabidopsis thaliana protein match is: unknown protein (TAIR:AT1G47400.1); Has 9 Blast hits to 9 proteins in 2 /.../s: Archae - 0; Bacteria - 0; Metazoa - 0; Fungi - 0; Plants - 9; Viruses - 0; Other Eukaryotes - 0 (source: NCBI BLink). [Source:TAIR;Acc:AT1G473…
AT1G63580	-2.77805	CRRSP6	Probable cysteine-rich repeat secretory protein 6 [Source:UniProtKB/Swiss-Prot;Acc:Q9SH42]
AT4G04990	-2.77805		Protein of unknown function (DUF761) [Source:TAIR;Acc:AT4G04990]
AT1G63245	-2.81122	CLE14	CLAVATA3/ESR (CLE)-related protein 2 [Source:UniProtKB/Swiss-Prot;Acc:Q3ECJ5]
AT1G66440	-2.81122		Cysteine/Histidine-rich C1 domain family protein [Source:TAIR;Acc:AT1G66440]
AT4G33120	-2.81122		S-adenosyl-L-methionine-dependent methyltransferases superfamily protein [Source:TAIR;Acc:AT4G33120]
AT1G02310	-2.84364	MAN1	Mannan endo-1,4-beta-mannosidase 1 [Source:UniProtKB/Swiss-Prot;Acc:Q9FZ29]
AT2G23910	-2.84364		NAD(P)-binding Rossmann-fold superfamily protein [Source:TAIR;Acc:AT2G23910]
AT3G53980	-2.84935		Bifunctional inhibitor/lipid-transfer protein/seed storage 2S albumin superfamily protein [Source:TAIR;Acc:AT3G53980]
AT1G68620	-2.85373	CXE6	Probable carboxylesterase 6 [Source:UniProtKB/Swiss-Prot;Acc:Q9SX25]
AT1G64110	-2.86636		P-loop containing nucleoside triphosphate hydrolases superfamily protein [Source:TAIR;Acc:AT1G64110]
AT1G74590	-2.87355	GSTU10	Glutathione S-transferase U10 [Source:UniProtKB/Swiss-Prot;Acc:Q9CA57]
AT2G43880	-2.87535		Pectin lyase-like superfamily protein [Source:TAIR;Acc:AT2G43880]
AT1G32350	-2.89094	AOX3	Ubiquinol oxidase 3, mitochondrial [Source:UniProtKB/Swiss-Prot;Acc:Q8LEE7]
AT3G09400	-2.89094	PLL3	Probable protein phosphatase 2C 36 [Source:UniProtKB/Swiss-Prot;Acc:Q9SR24]
AT4G09770	-2.89094		TRAF-like family protein [Source:TAIR;Acc:AT4G09770]
AT5G12340	-2.91657		unknown protein; BEST Arabidopsis thaliana protein match is: unknown protein (TAIR:AT1G28190.1); Has 30201 Blast hits to 17322 proteins in 780 species: Archae - 12; Bacteria - 1396; Metazoa - 17338; Fungi - 3422; Plants - 5037; Viruses - 0; Other Eu /.../es - 2996 (source: NCBI BLink). [Source:TAIR;Acc:AT5G12340]
AT1G77520	-2.92381		O-methyltransferase family protein [Source:TAIR;Acc:AT1G77520]
AT2G33790	-2.93077	AGP30	Non-classical arabinogalactan protein 30 [Source:UniProtKB/Swiss-Prot;Acc:P93013]
AT1G65481	-2.93675		unknown protein; FUNCTIONS IN: molecular_function unknown; INVOLVED IN: biological_process unknown; LOCATED IN: endomembrane system. [Source:TAIR;Acc:AT1G65481]
AT1G67270	-2.93675		Zinc-finger domain of monoamine-oxidase A repressor R1 protein [Source:TAIR;Acc:AT1G67270]
AT1G76650	-2.93675	CML38	Calcium-binding protein CML38 [Source:UniProtKB/Swiss-Prot;Acc:Q9SRE6]
AT2G19150	-2.93675	PME10	Putative pectinesterase 10 [Source:UniProtKB/Swiss-Prot;Acc:O64479]
AT5G26930	-2.93675	GATA23	GATA transcription factor 23 [Source:UniProtKB/Swiss-Prot;Acc:Q8LC59]
AT5G39670	-2.93675	CML45	Probable calcium-binding protein CML45 [Source:UniProtKB/Swiss-Prot;Acc:Q93Z27]
AT5G46060	-2.93675		Protein of unknown function, DUF599 [Source:TAIR;Acc:AT5G46060]
AT5G48100	-2.93675	TT10	Laccase-15 [Source:UniProtKB/Swiss-Prot;Acc:Q84J37]
AT2G41480	-2.95756	PER25	Peroxidase superfamily protein [Source:TAIR;Acc:AT2G41480]
AT3G24750	-2.98114		unknown protein; Has 25 Blast hits to 25 proteins in 12 species: Archae - 0; Bacteria - 8; Metazoa - 2; Fungi - 0; Plants - 15; Viruses - 0; Other Eukaryotes - 0 (source: NCBI BLink). [Source:TAIR;Acc:AT3G24750]
AT3G61390	-2.98114	PUB36	U-box domain-containing protein 36 [Source:UniProtKB/Swiss-Prot;Acc:Q8GZ84]
AT4G28110	-2.98114	AtMYB41	myb domain protein 41 [Source:TAIR;Acc:AT4G28110]
AT5G13580	-2.98316	ABCG6	ABC transporter G family member 6 [Source:UniProtKB/Swiss-Prot;Acc:Q9FNB5]
AT3G50400	-2.98599		GDSL esterase/lipase At3g50400 [Source:UniProtKB/Swiss-Prot;Acc:Q9M2R9]
AT1G13520	-2.99903		Protein of unknown function (DUF1262) [Source:TAIR;Acc:AT1G13520]
AT2G33380	-3.0003	PXG3	Probable peroxygenase 3 [Source:UniProtKB/Swiss-Prot;Acc:O22788]
AT2G28700	-3.07425	AGL46	AGAMOUS-like 46 [Source:TAIR;Acc:AT2G28700]
AT5G06760	-3.07425	LEA4-5	Late Embryogenesis Abundant 4-5 [Source:TAIR;Acc:AT5G06760]
AT2G42530	-3.10667	COR15B	Protein COLD-REGULATED 15B, chloroplastic [Source:UniProtKB/Swiss-Prot;Acc:Q9SIN5]
AT3G21500	-3.10667	DXPS1	1-deoxy-D-xylulose 5-phosphate synthase 1 [Source:TAIR;Acc:AT3G21500]
AT3G44860	-3.10667	FAMT	farnesoic acid carboxyl-O-methyltransferase [Source:TAIR;Acc:AT3G44860]
AT4G05095	-3.10667		BEST Arabidopsis thaliana protein match is: RNA-directed DNA polymerase (reverse transcriptase)-related family protein (TAIR:AT4G04650.1); Has 30201 Blast hits to 17322 proteins in 780 species: Archae - 12; Bacteria - 1396; Metazoa - 17338; Fungi - /.../Plants - 5037; Viruses - 0; Other Eukaryotes - 2996 (source: NCBI BLink). [Source:TAIR;Acc:AT4G05095]
AT5G11360	-3.10667		Interleukin-1 receptor-associated kinase 4 protein [Source:TAIR;Acc:AT5G11360]
AT5G46090	-3.10667		Protein of unknown function (DUF679) [Source:TAIR;Acc:AT5G46090]
AT5G51210	-3.10667	OL3	Oleosin 14.9 kDa [Source:UniProtKB/Swiss-Prot;Acc:Q43284]
AT5G52300	-3.10667	LTI65	Low-temperature-induced 65 kDa protein [Source:UniProtKB/Swiss-Prot;Acc:Q04980]
AT3G12900	-3.11732		2-oxoglutarate (2OG) and Fe(II)-dependent oxygenase superfamily protein [Source:TAIR;Acc:AT3G12900]
AT3G52310	-3.13838	ABCG27	ABC-2 type transporter family protein [Source:TAIR;Acc:AT3G52310]
AT5G66400	-3.13838	RAB18	Dehydrin Rab18 [Source:UniProtKB/Swiss-Prot;Acc:P30185]
AT2G14247	-3.15422		Expressed protein [Source:TAIR;Acc:AT2G14247]
AT5G52020	-3.15914	ERF025	Ethylene-responsive transcription factor ERF025 [Source:UniProtKB/Swiss-Prot;Acc:Q9FJ90]
AT2G47460	-3.17379	MYB12	Transcription factor MYB12 [Source:UniProtKB/Swiss-Prot;Acc:O22264]
AT1G73160	-3.18467		UDP-Glycosyltransferase superfamily protein [Source:TAIR;Acc:AT1G73160]
AT5G16960	-3.18467		Zinc-binding dehydrogenase family protein [Source:TAIR;Acc:AT5G16960]
AT1G12030	-3.18797		Protein of unknown function (DUF506) [Source:TAIR;Acc:AT1G12030]
AT3G03670	-3.20977	PER28	Peroxidase 28 [Source:UniProtKB/Swiss-Prot;Acc:Q9SS67]
AT5G12030	-3.20977	HSP17.7	17.7 kDa class II heat shock protein [Source:UniProtKB/Swiss-Prot;Acc:O81822]
AT2G04070	-3.25867	DTXL2	MATE efflux family protein 6 [Source:UniProtKB/Swiss-Prot;Acc:Q9SIA3]
AT5G14180	-3.2943	LIP2	Triacylglycerol lipase 2 [Source:UniProtKB/Swiss-Prot;Acc:Q67ZU1]
AT2G01520	-3.30472	MLP328	MLP-like protein 328 [Source:UniProtKB/Swiss-Prot;Acc:Q9ZVF3]
AT1G52890	-3.3102	NAC019	NAC domain-containing protein 19 [Source:UniProtKB/Swiss-Prot;Acc:Q9C932]
AT1G66700	-3.32904	PXMT1	S-adenosyl-L-methionine-dependent methyltransferases superfamily protein [Source:TAIR;Acc:AT1G66700]
AT5G01550	-3.32906	LECRK63	Lectin-domain containing receptor kinase VI.3 [Source:UniProtKB/Swiss-Prot;Acc:Q9M020]
AT5G43840	-3.39618	HSFA6A	Heat stress transcription factor A-6a [Source:UniProtKB/Swiss-Prot;Acc:Q1PDN3]
AT1G01590	-3.46031	FRO1	Probable ferric reduction oxidase 1 [Source:UniProtKB/Swiss-Prot;Acc:Q9LMM2]
AT1G05880	-3.46031	ARI12	Probable E3 ubiquitin-protein ligase ARI12 [Source:UniProtKB/Swiss-Prot;Acc:Q84RQ9]
AT1G47890	-3.46031	AtRLP7	receptor like protein 7 [Source:TAIR;Acc:AT1G47890]
AT4G28410	-3.47816		Tyrosine transaminase family protein [Source:TAIR;Acc:AT4G28410]
AT3G56980	-3.50869	ORG3	Transcription factor ORG3 [Source:UniProtKB/Swiss-Prot;Acc:Q9M1K0]
AT1G73165	-3.52171	CLE1	CLAVATA3/ESR (CLE)-related protein 1 [Source:UniProtKB/Swiss-Prot;Acc:Q3ECD6]
AT4G13300	-3.52171	TPS13	(Z)-gamma-bisabolene synthase 2 [Source:UniProtKB/Swiss-Prot;Acc:Q9T0K1]
AT4G37409	-3.52171		unknown protein; FUNCTIONS IN: molecular_function unknown; INVOLVED IN: biological_process unknown; LOCATED IN: cellular_component unknown; Has 30201 Blast hits to 17322 proteins in 780 species: Archae - 12; Bacteria - 1396; Metazoa - 17338; Fungi - /.../ Plants - 5037; Viruses - 0; Other Eukaryotes - 2996 (source: NCBI BLink). [Source:TAIR;Acc:AT4G37409]
AT5G47450	-3.57062	TIP2-3	Aquaporin TIP2-3 [Source:UniProtKB/Swiss-Prot;Acc:Q9FGL2]
AT1G07900	-3.5806	LBD1	LOB domain-containing protein 1 [Source:UniProtKB/Swiss-Prot;Acc:Q9LQR0]
AT1G53540	-3.5806	HSP17.6C	17.6 kDa class I heat shock protein 3 [Source:UniProtKB/Swiss-Prot;Acc:P13853]
AT2G30750	-3.6926	CYP71A12	cytochrome P450, family 71, subfamily A, polypeptide 12 [Source:TAIR;Acc:AT2G30750]
AT1G60190	-3.70726	PUB19	U-box domain-containing protein 19 [Source:UniProtKB/Swiss-Prot;Acc:O80742]
AT2G35300	-3.74458	LEA18	Late embryogenesis abundant protein, group 1 protein [Source:TAIR;Acc:AT2G35300]
AT3G56970	-3.78919	ORG2	Transcription factor ORG2 [Source:UniProtKB/Swiss-Prot;Acc:Q9M1K1]
AT3G63060	-3.84364	EDL3	EID1-like F-box protein 3 [Source:UniProtKB/Swiss-Prot;Acc:Q93ZT5]
AT5G15290	-3.84364	CASP5	Casparian strip membrane protein 5 [Source:UniProtKB/Swiss-Prot;Acc:Q9LXF3]
AT4G21440	-3.98114	ATMYB102	MYB-like 102 [Source:TAIR;Acc:AT4G21440]
AT4G38560	-4.02421		Arabidopsis phospholipase-like protein (PEARLI 4) family [Source:TAIR;Acc:AT4G38560]
AT2G19500	-4.06603	CKX2	Cytokinin dehydrogenase 2 [Source:UniProtKB/Swiss-Prot;Acc:Q9FUJ3]
AT2G31083	-4.06603	CLE5	CLAVATA3/ESR (CLE)-related protein 5 [Source:UniProtKB/Swiss-Prot;Acc:Q8S8N2]
AT3G55090	-4.06603	ABCG16	ABC transporter G family member 16 [Source:UniProtKB/Swiss-Prot;Acc:Q9M2V7]
AT2G29220	-4.32907	LECRK31	Probable inactive L-type lectin-domain containing receptor kinase III.1 [Source:UniProtKB/Swiss-Prot;Acc:Q9ZW09]
AT2G22590	-4.33258	UGT91A1	UDP-glycosyltransferase 91A1 [Source:UniProtKB/Swiss-Prot;Acc:Q940V3]
AT1G64940	-4.34614	CYP89A6	cytochrome P450, family 87, subfamily A, polypeptide 6 [Source:TAIR;Acc:AT1G64940]
AT2G47770	-4.46031	TSPO	Translocator protein homolog [Source:UniProtKB/Swiss-Prot;Acc:O82245]
AT5G28520	-4.46031	JAL40	Jacalin-related lectin 40 [Source:UniProtKB/Swiss-Prot;Acc:Q9LKR6]
AT5G19470	-4.5806	NUDT24	Nudix hydrolase 24, chloroplastic [Source:UniProtKB/Swiss-Prot;Acc:P0C026]
AT5G28510	-4.93675	BGLU24	Beta-glucosidase 24 [Source:UniProtKB/Swiss-Prot;Acc:Q9LKR7]
AT4G29340	-4.98114	PRO3	Profilin-3 [Source:UniProtKB/Swiss-Prot;Acc:Q38904]
AT1G67080	-5.13696	ABA4	abscisic acid (aba)-deficient 4 [Source:TAIR;Acc:AT1G67080]
AT3G01175	-5.22215		Protein of unknown function (DUF1666) [Source:TAIR;Acc:AT3G01175]
AT2G16970	-5.25867	MEE15	Major facilitator superfamily protein [Source:TAIR;Acc:AT2G16970]
AT5G38820	-5.74413		Transmembrane amino acid transporter family protein [Source:TAIR;Acc:AT5G38820]
AT5G03210	-5.81939		unknown protein; FUNCTIONS IN: molecular_function unknown; INVOLVED IN: biological_process unknown; LOCATED IN: endomembrane system; EXPRESSED IN: 11 plant structures; EXPRESSED DURING: 7 growth stages; Has 6 Blast hits to 6 proteins in 2 species: A /.../- 0; Bacteria - 0; Metazoa - 0; Fungi - 0; Plants - 6; Viruses - 0; Other Eukaryotes - 0 (source: NCBI BLink). [Source:TAIR;Acc:AT5G03210]
AT1G58320	-5.86748	PCR9	Protein PLANT CADMIUM RESISTANCE 9 [Source:UniProtKB/Swiss-Prot;Acc:P0CW98]
AT1G67980	-6.08649	CCOAMT	Putative caffeoyl-CoA O-methyltransferase At1g67980 [Source:UniProtKB/Swiss-Prot;Acc:Q9C9W3]
