# Supplementary material
Source: MDPI journal article supplement (https://www.mdpi.com/2076-3417/7/1/85)
Supplement: s1 [file s1 › Table S4.xlsx]

## Sheet: Sheet1
Table S4. Up-regulated or down-regulated differentially expressed genes (DEGs) including some amino acid transport-, Fe acquisition-, and sulfate transport-related genes in the VOCs-exposed plants.
ID	Expression pattern	Gene name	Annotation
Amino acid tranport-related genes
AT1G21890	Up	UmamiT19	putative MtN21/SIAR/UmamiT-type amino acid transporter [Source:UniProtKB/Swiss-Prot;Acc:F4HZQ7]
AT1G44800	Up	SIAR1	putative MtN21/SIAR/UmamiT-type amino acid transporter[Source:UniProtKB/Swiss-Prot;Acc:Q9LPF1]
AT4G08290	Up	UmamiT20	putative MtN21/SIAR/UmamiT-type amino acid transporter [Source:UniProtKB/Swiss-Prot;Acc:Q9SUF1]
AT4G08300	Up	UmamiT17	putative MtN21/SIAR/UmamiT-type amino acid transporter[Source:UniProtKB/Swiss-Prot;Acc:Q501F8]
Sulfate transport-related genes
AT4G08620	Up	SULTR1;1	Sulfate transporter 1.1 [Source:UniProtKB/Swiss-Prot;Acc:Q9SAY1]
AT1G78000	Up	SULTR1;2	Sulfate transporter 1.2 [Source:UniProtKB/Swiss-Prot;Acc:Q9MAX3]
AT5G10180	Up	SULTR2;1	Sulfate transporter 2.1 [Source:UniProtKB/Swiss-Prot;Acc:O04722]
AT1G77990	Up	SULTR2;2	Sulfate transporter 2.2 [Source:UniProtKB/Swiss-Prot;Acc:P92946]
AT5G19600	Up	SULTR3;5	Probable sulfate transporter 3.5 [Source:UniProtKB/Swiss-Prot;Acc:Q94LW6]
Iron acquisition-related genes
AT4G19690	Up	IRT1	Fe(II) transport protein 1 [Source:UniProtKB/Swiss-Prot;Acc:Q38856]
AT1G60960	Up	IRT3	Fe(II) transport protein 3, chloroplastic [Source:UniProtKB/Swiss-Prot;Acc:Q8LE59]
AT1G01590	Up	FRO1	Probable ferric reduction oxidase 1 [Source:UniProtKB/Swiss-Prot;Acc:Q9LMM2]
AT1G01580	Up	FRO2	Ferric reduction oxidase 2 [Source:UniProtKB/Swiss-Prot;Acc:P92949]
At2g28160	Up	FIT1	Transcription factor bHLH029 [Source:UniProtKB/Swiss-Prot;Acc:Q0V7X4]
AT3G23210	Up	BHLH034	Transcription factor bHLH34 [Source:UniProtKB/Swiss-Prot;Acc:Q9LTC7]
AT2G41240	Up	BHLH100	Transcription factor bHLH100 [Source:UniProtKB/Swiss-Prot;Acc:Q9ZVB5]
AT5G04150	Up	BHLH101	Transcription factor bHLH101 [Source:UniProtKB/Swiss-Prot;Acc:Q9FYE6]
AT4G14410	Up	BHLH104	Transcription factor bHLH104 [Source:UniProtKB/Swiss-Prot;Acc:Q8L467]
ABA-biosynthetic and responsive genes
AT1G52340	Down	ABA2	Xanthoxin dehydrogenase [Source:UniProtKB/Swiss-Prot;Acc:Q9C826]
AT1G16540	Down	ABA3	Molybdenum cofactor sulfurase [Source:UniProtKB/Swiss-Prot;Acc:Q9C5X8]
AT2G46510	Down	AIB	Transcription factor ABA-INDUCIBLE bHLH-TYPE [Source:UniProtKB/Swiss-Prot;Acc:Q9ZPY8]
AT1G67080	Down	ABA4	abscisic acid (aba)-deficient 4 [Source:TAIR;Acc:AT1G67080]
AT1G09950	Down	RAS1	RESPONSE TO ABA AND SALT 1 [Source:TAIR;Acc:AT1G09950]
AT5G23350	Down	GRE6	GRAM domain-containing protein / ABA-responsive protein-related [Source:TAIR;Acc:AT5G23350]
